# Supplementary material for: High-Throughput Genotyping of Common Chromosomal Inversions in the Afrotropical Malaria Mosquito Anopheles Funestus
Source: Insects. 2020 Oct 13;11(10):693. doi: 10.3390/insects11100693 (PMC7650614; doi:10.3390/insects11100693)
Supplement: Supplementary file 1 [file insects-11-00693-s001.zip]

Archive with 18 entries (18 files):
- __MACOSX/._Cover Letter for Revisions Insects 30Sep2020.pdf
- Fig1_tag_locations_imagefix_28Sep20.pdf
- __MACOSX/._Fig1_tag_locations_imagefix_28Sep20.pdf
- Fig2_tag_ven_imagefix_28Sep20.pdf
- __MACOSX/._Fig2_tag_ven_imagefix_28Sep20.pdf
- FigS1_PCA_with_legend_29Sep2020.pdf
- __MACOSX/._FigS1_PCA_with_legend_29Sep2020.pdf
- FigS2_filtering_with_legend.pdf
- __MACOSX/._FigS2_filtering_with_legend.pdf
- __MACOSX/._insects-946850_30Sep2020.docx
- TableS1_WGS_SNP_Ascertainment_29Sep20.xlsx
- __MACOSX/._TableS1_WGS_SNP_Ascertainment_29Sep20.xlsx
- TableS2_validation_sample_29Sep2020.xlsx
- __MACOSX/._TableS2_validation_sample_29Sep2020.xlsx
- TableS3_OA_Designs_092820.xlsx
- __MACOSX/._TableS3_OA_Designs_092820.xlsx
- TableS4_AS_Designs_091020_BL.xlsx
- __MACOSX/._TableS4_AS_Designs_091020_BL.xlsx
