# Supplementary material for: High-Throughput Genotyping of Common Chromosomal Inversions in the Afrotropical Malaria Mosquito Anopheles Funestus
Source: Insects. 2020 Oct 13;11(10):693. doi: 10.3390/insects11100693 (PMC7650614; doi:10.3390/insects11100693)
Supplement: Supplementary file 1 [file insects-11-00693-s001.zip › TableS1_WGS_SNP_Ascertainment_29Sep20.xlsx]

## Sheet: retained_specimens
Table S1. Mosquito samples subject to Ilumina whole-genome sequencing toward tag SNP ascertainment. Shown are the VCF-ID, Specimen ID, Country, Village, and Date of collection, as well as the cytogenetic (cyt) and PCA-based (PCA) karyotype at the three studied inversions (2Ra, 3Ra, 3Rb). Genotypes are 0 (standard homozygote), 1 (heterozygote) and 2 (inverted homozygote), N (not determined).
VCF_ID	Specimen_ID	Country	Village	Date of collection	2Ra-cyt	2Ra-PCA	3Ra-cyt	3Ra-PCA	3Rb-cyt	3Rb-PCA
Kuiti_00-01331_Kiribina	00-01331	Burkina Faso	Kuiti	2000-09-05	0	0	0	0	0	0
Kuiti_00-01332_Kiribina	00-01332	Burkina Faso	Kuiti	2000-09-05	0	0	0	0	0	0
Kuiti_00-01334_Kiribina	00-01334	Burkina Faso	Kuiti	2000-09-05	0	0	0	0	0	0
Kuiti_00-01396_Kiribina	00-01396	Burkina Faso	Kuiti	2000-09-06	0	0	0	0	0	0
Kuiti_00-01397_Kiribina	00-01397	Burkina Faso	Kuiti	2000-09-06	0	0	0	0	0	0
Kuiti_00-01398_Kiribina	00-01398	Burkina Faso	Kuiti	2000-09-06	0	0	0	0	0	0
Kuiti_00-01399_Kiribina	00-01399	Burkina Faso	Kuiti	2000-09-06	0	0	0	0	0	0
Koubri_00-01401_Kiribina	00-01401	Burkina Faso	Koubri	2000-09-04	0	0	0	0	0	0
Koubri_00-01413_Kiribina	00-01413	Burkina Faso	Koubri	2000-09-04	0	0	0	0	0	0
Koubri_00-01421_Folonzo	00-01421	Burkina Faso	Koubri	2000-09-04	1	1	2	2	0	0
Koubri_00-01422_Kiribina	00-01422	Burkina Faso	Koubri	2000-09-04	0	0	0	0	0	0
Koubri_00-01426_Kiribina	00-01426	Burkina Faso	Koubri	2000-09-05	0	0	0	0	0	0
Koubri_00-01431_Kiribina	00-01431	Burkina Faso	Koubri	2000-09-05	0	0	0	0	0	0
Koubri_00-01432_Folonzo	00-01432	Burkina Faso	Koubri	2000-09-05	N	2	2	2	0	0
Koubri_00-01433_Kiribina	00-01433	Burkina Faso	Koubri	2000-09-05	0	0	0	0	0	0
Koubri_00-01434_Kiribina	00-01434	Burkina Faso	Koubri	2000-09-05	0	0	1	1	0	0
Koubri_00-01435_Folonzo	00-01435	Burkina Faso	Koubri	2000-09-05	1	1	2	2	0	0
Koubri_00-01455_Kiribina	00-01455	Burkina Faso	Koubri	2000-09-06	0	0	1	1	0	0
Koubri_00-01456_Folonzo	00-01456	Burkina Faso	Koubri	2000-09-06	0	0	1	1	1	1
Koubri_00-01457_Kiribina	00-01457	Burkina Faso	Koubri	2000-09-06	0	0	0	0	0	0
Koubri_00-01459_Kiribina	00-01459	Burkina Faso	Koubri	2000-09-06	0	0	0	0	0	0
Koubri_00-01481_Kiribina	00-01481	Burkina Faso	Koubri	2000-09-06	0	0	0	0	0	0
Koubri_00-01482_Kiribina	00-01482	Burkina Faso	Koubri	2000-09-06	0	0	0	0	0	0
Koubri_00-01488_Kiribina	00-01488	Burkina Faso	Koubri	2000-09-06	0	0	1	0	0	0
Koubri_00-01490_Folonzo	00-01490	Burkina Faso	Koubri	2000-09-06	N	0	1	1	1	0
Kuiti_00-01516_Kiribina	00-01516	Burkina Faso	Kuiti	2000-09-11	0	0	0	0	0	0
Kuiti_00-01517_Kiribina	00-01517	Burkina Faso	Kuiti	2000-09-11	0	0	0	0	0	0
Kuiti_00-01519_Kiribina	00-01519	Burkina Faso	Kuiti	2000-09-11	0	0	0	0	0	0
Kuiti_00-01520_Kiribina	00-01520	Burkina Faso	Kuiti	2000-09-11	0	0	0	0	0	0
Kuiti_00-01522_Kiribina	00-01522	Burkina Faso	Kuiti	2000-09-11	0	0	0	0	0	0
Kuiti_00-01523_Kiribina	00-01523	Burkina Faso	Kuiti	2000-09-11	0	0	0	0	0	0
Kuiti_00-01525_Kiribina	00-01525	Burkina Faso	Kuiti	2000-09-12	0	0	0	0	0	0
Kuiti_00-01526_Folonzo	00-01526	Burkina Faso	Kuiti	2000-09-12	2	2	2	2	1	1
Kuiti_00-01527_Kiribina	00-01527	Burkina Faso	Kuiti	2000-09-12	0	0	0	0	0	0
Kuiti_00-01528_Kiribina	00-01528	Burkina Faso	Kuiti	2000-09-12	0	0	0	0	0	0
Koubri_00-01606_Kiribina	00-01606	Burkina Faso	Koubri	2000-09-12	0	0	0	0	0	0
Koubri_00-01607_Kiribina	00-01607	Burkina Faso	Koubri	2000-09-12	0	0	0	0	0	0
Koubri_00-01611_Kiribina	00-01611	Burkina Faso	Koubri	2000-09-13	0	0	0	0	0	0
Koubri_00-01612_Folonzo	00-01612	Burkina Faso	Koubri	2000-09-13	0	0	1	1	1	1
Koubri_00-01613_Kiribina	00-01613	Burkina Faso	Koubri	2000-09-13	0	0	0	0	0	0
Koubri_00-01616_Kiribina	00-01616	Burkina Faso	Koubri	2000-09-13	0	0	0	0	0	0
Koubri_00-01630_Kiribina	00-01630	Burkina Faso	Koubri	2000-09-13	0	0	0	0	0	0
Koubri_00-01631_Kiribina	00-01631	Burkina Faso	Koubri	2000-09-13	0	0	0	0	0	0
Kuiti_00-03385_Folonzo	00-03385	Burkina Faso	Kuiti	2000-11-15	N	1	2	2	1	1
Kuiti_00-03426_Folonzo	00-03426	Burkina Faso	Kuiti	2000-11-20	1	1	2	2	1	1
Koubri_00-03530_Folonzo	00-03530	Burkina Faso	Koubri	2000-11-22	1	0	2	0	2	0
Koubri_00-03541_Folonzo	00-03541	Burkina Faso	Koubri	2000-11-22	1	1	1	1	1	1
Koubri_00-03544_Folonzo	00-03544	Burkina Faso	Koubri	2000-11-22	2	2	2	2	0	0
Kuiti_00-03666_Folonzo	00-03666	Burkina Faso	Kuiti	2000-11-22	0	1	1	1	2	2
Kuiti_00-03773_Folonzo	00-03773	Burkina Faso	Kuiti	2000-11-29	N	1	2	2	1	1
Kuiti_00-03776_Folonzo	00-03776	Burkina Faso	Kuiti	2000-11-29	2	2	2	2	1	1
Kuiti_00-03777_Kiribina	00-03777	Burkina Faso	Kuiti	2000-11-29	0	0	0	0	0	0
Koubri_00-03830_Folonzo	00-03830	Burkina Faso	Koubri	2000-11-29	1	1	1	1	2	2
Kuiti_00-04003_Folonzo	00-04003	Burkina Faso	Kuiti	2000-12-06	2	2	2	2	1	1
Kuiti_00-04366_Folonzo	00-04366	Burkina Faso	Kuiti	2000-12-13	0	0	2	2	2	2
Kuiti_00-04373_Folonzo	00-04373	Burkina Faso	Kuiti	2000-12-13	2	2	2	2	1	1
Koubri_01-04357_Kiribina	01-04357	Burkina Faso	Koubri	2001-11-13	0	0	0	0	0	0
Koubri_01-04358_Folonzo	01-04358	Burkina Faso	Koubri	2001-11-13	0	0	1	1	1	1
Koubri_01-04359_Kiribina	01-04359	Burkina Faso	Koubri	2001-11-13	0	0	0	0	0	0
Koubri_01-04360_Kiribina	01-04360	Burkina Faso	Koubri	2001-11-13	0	0	0	0	0	0
Koubri_01-04362_Folonzo	01-04362	Burkina Faso	Koubri	2001-11-13	N	1	2	2	1	1
Ipendo_01-05791_Kiribina	01-05791	Burkina Faso	Ipendo	2001-12-15	0	2	0	2	0	2
Ipendo_01-05798_Kiribina	01-05798	Burkina Faso	Ipendo	2001-12-15	0	1	0	2	0	1
Ipendo_01-06373_Folonzo	01-06373	Burkina Faso	Ipendo	2001-12-15	2	2	2	2	2	2
Ipendo_01-06375_Folonzo	01-06375	Burkina Faso	Ipendo	2001-12-15	1	1	2	2	2	2
Ipendo_01-06387_Folonzo	01-06387	Burkina Faso	Ipendo	2001-12-15	1	1	1	1	1	1
Ipendo_01-06389_Folonzo	01-06389	Burkina Faso	Ipendo	2001-12-15	2	2	2	2	1	1
Pehele_02-05622_Kiribina	02-05622	Burkina Faso	Pehele	2002-11-19	0	0	0	0	0	0
Pehele_02-05624_Folonzo	02-05624	Burkina Faso	Pehele	2002-11-19	2	2	2	2	1	1
Pehele_02-05630_Kiribina	02-05630	Burkina Faso	Pehele	2002-11-19	0	0	0	0	0	0
Pehele_02-05632_Kiribina	02-05632	Burkina Faso	Pehele	2002-11-19	0	0	0	0	0	0
Pehele_02-05634_Kiribina	02-05634	Burkina Faso	Pehele	2002-11-19	0	0	0	0	0	0
Pehele_02-05640_Folonzo	02-05640	Burkina Faso	Pehele	2002-11-19	0	1	2	2	0	0
Pehele_02-05652_Folonzo	02-05652	Burkina Faso	Pehele	2002-11-19	N	1	2	2	0	0
Pehele_02-05656_Kiribina	02-05656	Burkina Faso	Pehele	2002-11-19	0	0	0	0	0	0
Pehele_02-05660_Kiribina	02-05660	Burkina Faso	Pehele	2002-11-19	0	0	0	0	0	0
Pehele_02-05664_Kiribina	02-05664	Burkina Faso	Pehele	2002-11-19	0	0	1	1	0	1
Pehele_02-05666_Folonzo	02-05666	Burkina Faso	Pehele	2002-11-19	0	0	2	2	N	1
Pehele_02-05670_Folonzo	02-05670	Burkina Faso	Pehele	2002-11-19	1	1	1	1	0	0
Kuiti_02-06207_Folonzo	02-06207	Burkina Faso	Kuiti	2002-12-02	0	0	2	2	1	1
Kuiti_02-06209_Folonzo	02-06209	Burkina Faso	Kuiti	2002-12-02	1	1	2	2	2	0
Kuiti_02-06212_Folonzo	02-06212	Burkina Faso	Kuiti	2002-12-02	1	1	2	2	1	1
Kuiti_02-06213_Kiribina	02-06213	Burkina Faso	Kuiti	2002-12-02	0	0	0	0	0	0
Kuiti_02-06217_Kiribina	02-06217	Burkina Faso	Kuiti	2002-12-02	0	0	1	1	0	0
Kuiti_02-06222_Kiribina	02-06222	Burkina Faso	Kuiti	2002-12-02	0	0	0	0	0	0
Kuiti_02-06223_Folonzo	02-06223	Burkina Faso	Kuiti	2002-12-02	2	2	2	2	2	2
Pehele_02-06345_Kiribina	02-06345	Burkina Faso	Pehele	2002-12-07	0	0	0	0	0	0
Pehele_02-06377_Folonzo	02-06377	Burkina Faso	Pehele	2002-12-07	0	0	2	2	1	1
Pehele_02-06394_Folonzo	02-06394	Burkina Faso	Pehele	2002-12-07	N	2	2	2	2	0
Pehele_02-06409_Kiribina	02-06409	Burkina Faso	Pehele	2002-12-07	0	0	0	0	0	0
Siby_02-06439_Kiribina	02-06439	Burkina Faso	Siby	2002-12-09	0	0	0	0	0	0
Ividie_02-06477_Kiribina	02-06477	Burkina Faso	Ividie	2002-12-10	0	0	1	1	0	0
Ividie_02-06649_Kiribina	02-06649	Burkina Faso	Ividie	2002-12-10	0	0	0	0	0	0
Vi_02-06681_Folonzo	02-06681	Burkina Faso	Vi	2002-12-11	N	1	2	2	1	1
Vi_02-06695_Kiribina	02-06695	Burkina Faso	Vi	2002-12-11	0	0	0	0	0	0
Vi_02-06801_Kiribina	02-06801	Burkina Faso	Vi	2002-12-11	0	0	0	0	0	0
Vi_02-06809_Folonzo	02-06809	Burkina Faso	Vi	2002-12-11	2	2	2	2	0	0
Vi_02-06817_Folonzo	02-06817	Burkina Faso	Vi	2002-12-11	2	2	2	2	2	2
Vi_02-06821_Kiribina	02-06821	Burkina Faso	Vi	2002-12-11	0	0	0	0	1	0
Vi_02-06825_Folonzo	02-06825	Burkina Faso	Vi	2002-12-11	N	0	2	2	N	1
Vi_02-06829_Folonzo	02-06829	Burkina Faso	Vi	2002-12-11	2	2	2	2	2	2
Vi_02-06837_Folonzo	02-06837	Burkina Faso	Vi	2002-12-11	0	0	2	2	2	0
Vi_02-06839_Folonzo	02-06839	Burkina Faso	Vi	2002-12-11	2	2	2	2	1	1
Vi_02-06845_Folonzo	02-06845	Burkina Faso	Vi	2002-12-11	N	2	2	2	2	2
Vi_02-06847_Kiribina	02-06847	Burkina Faso	Vi	2002-12-11	0	0	0	0	0	0
Vi_02-06849_Kiribina	02-06849	Burkina Faso	Vi	2002-12-11	0	0	0	0	0	0
Vi_02-06851_Folonzo	02-06851	Burkina Faso	Vi	2002-12-11	2	2	2	2	1	1
Vi_02-06855_Folonzo	02-06855	Burkina Faso	Vi	2002-12-11	1	0	1	0	2	0
Vi_02-06861_Kiribina	02-06861	Burkina Faso	Vi	2002-12-11	0	0	0	0	0	0
Vi_02-06873_Folonzo	02-06873	Burkina Faso	Vi	2002-12-11	1	1	2	2	0	0
Dirze_02-06905_Kiribina	02-06905	Burkina Faso	Dirze	2002-12-14	0	0	0	0	0	0
Dirze_02-06915_Kiribina	02-06915	Burkina Faso	Dirze	2002-12-14	0	0	0	0	0	0
Dirze_02-06949_Kiribina	02-06949	Burkina Faso	Dirze	2002-12-14	0	0	0	0	0	0
Dirze_02-07029_Kiribina	02-07029	Burkina Faso	Dirze	2002-12-14	0	0	0	0	0	0
Dirze_02-07053_Kiribina	02-07053	Burkina Faso	Dirze	2002-12-14	0	0	0	0	0	0
Dirze_02-07079_Kiribina	02-07079	Burkina Faso	Dirze	2002-12-14	0	0	0	0	0	0
Dirze_02-07095_Kiribina	02-07095	Burkina Faso	Dirze	2002-12-14	0	0	0	0	0	0
Sabtenga_02-07101_Folonzo	02-07101	Burkina Faso	Sabtenga	2002-12-15	1	1	2	2	1	1
Sabtenga_02-07104_Folonzo	02-07104	Burkina Faso	Sabtenga	2002-12-15	0	0	2	2	1	1
Sabtenga_02-07106_Folonzo	02-07106	Burkina Faso	Sabtenga	2002-12-15	2	1	1	1	2	2
Sabtenga_02-07107_Folonzo	02-07107	Burkina Faso	Sabtenga	2002-12-15	1	1	1	1	1	1
Sabtenga_02-07108_Folonzo	02-07108	Burkina Faso	Sabtenga	2002-12-15	1	1	2	2	2	2
Sabtenga_02-07110_Folonzo	02-07110	Burkina Faso	Sabtenga	2002-12-15	2	2	2	2	1	1
Sabtenga_02-07111_Folonzo	02-07111	Burkina Faso	Sabtenga	2002-12-15	N	0	2	2	1	1
Sabtenga_02-07112_Folonzo	02-07112	Burkina Faso	Sabtenga	2002-12-15	1	1	2	2	1	1
Sabtenga_02-07125_Folonzo	02-07125	Burkina Faso	Sabtenga	2002-12-15	2	2	2	2	2	2
Sabtenga_02-07133_Kiribina	02-07133	Burkina Faso	Sabtenga	2002-12-15	0	0	0	0	0	0
Sabtenga_02-07145_Folonzo	02-07145	Burkina Faso	Sabtenga	2002-12-15	N	0	2	2	2	2
Sabtenga_02-07193_Folonzo	02-07193	Burkina Faso	Sabtenga	2002-12-15	0	2	1	1	1	1
Sabtenga_02-07199_Folonzo	02-07199	Burkina Faso	Sabtenga	2002-12-15	0	0	2	2	1	1
Dirze_02-07241_Kiribina	02-07241	Burkina Faso	Dirze	2002-12-14	0	0	0	0	0	0
Dirze_02-07293_Kiribina	02-07293	Burkina Faso	Dirze	2002-12-14	0	0	0	0	0	0
Dirze_02-07299_Kiribina	02-07299	Burkina Faso	Dirze	2002-12-14	0	0	0	0	0	0
Bagre_02-07327_Kiribina	02-07327	Burkina Faso	Bagre	2002-12-17	0	0	0	0	0	0
Bagre_02-07329_Kiribina	02-07329	Burkina Faso	Bagre	2002-12-17	0	0	0	0	0	0
Bagre_02-07341_Kiribina	02-07341	Burkina Faso	Bagre	2002-12-17	0	0	0	0	0	0
Bagre_02-07343_Kiribina	02-07343	Burkina Faso	Bagre	2002-12-17	0	0	0	0	0	0
Bagre_02-07344_Kiribina	02-07344	Burkina Faso	Bagre	2002-12-17	0	0	0	0	0	0
Bagre_02-07346_Kiribina	02-07346	Burkina Faso	Bagre	2002-12-17	0	0	0	0	0	0
Bagre_02-07351_Kiribina	02-07351	Burkina Faso	Bagre	2002-12-17	0	0	0	0	0	0
Bagre_02-07361_Kiribina	02-07361	Burkina Faso	Bagre	2002-12-17	0	0	0	0	0	0
Bagre_02-07363_Kiribina	02-07363	Burkina Faso	Bagre	2002-12-17	0	0	0	0	0	0
Bagre_02-07365_Kiribina	02-07365	Burkina Faso	Bagre	2002-12-17	0	0	0	0	0	0
Bagre_02-07373_Kiribina	02-07373	Burkina Faso	Bagre	2002-12-17	0	0	0	0	0	0
Bagre_02-07391_Kiribina	02-07391	Burkina Faso	Bagre	2002-12-17	0	0	0	0	0	0
Bagre_02-07397_Kiribina	02-07397	Burkina Faso	Bagre	2002-12-17	0	0	0	0	0	0
La_02-07526_Folonzo	02-07526	Burkina Faso	La	2002-12-18	0	0	2	0	0	0
La_02-07529_Folonzo	02-07529	Burkina Faso	La	2002-12-18	0	0	2	0	0	0
La_02-07537_Folonzo	02-07537	Burkina Faso	La	2002-12-18	2	2	2	2	2	2
La_02-07539_Folonzo	02-07539	Burkina Faso	La	2002-12-18	N	1	2	2	2	2
La_02-07544_Folonzo	02-07544	Burkina Faso	La	2002-12-18	0	2	2	2	1	1
La_02-07549_Folonzo	02-07549	Burkina Faso	La	2002-12-18	2	2	2	2	2	2
La_02-07557_Folonzo	02-07557	Burkina Faso	La	2002-12-18	N	1	2	2	N	1
La_02-07580_Folonzo	02-07580	Burkina Faso	La	2002-12-18	1	1	2	2	1	1
La_02-07675_Folonzo	02-07675	Burkina Faso	La	2002-12-18	1	1	2	2	0	0
La_02-07709_Folonzo	02-07709	Burkina Faso	La	2002-12-18	2	2	2	2	2	2
La_02-07745_Folonzo	02-07745	Burkina Faso	La	2002-12-18	N	1	2	2	1	1
La_02-07747_Folonzo	02-07747	Burkina Faso	La	2002-12-18	1	1	1	1	1	1
GhaF264	GhaF264	Ghana	Jimiso Kakraba	2004	N	0	N	2	N	2
GhaF265	GhaF265	Ghana	Jimiso Kakraba	2004	N	0	N	2	N	2
Ken4590	Ken4590	Kenya	Bigege	2010	N	2	N	1	N	1
MozF123	MozF123	Mozambique	Chibuto	2007	N	0	N	0	N	1
MozF260	MozF260	Mozambique	Chibuto	2007	N	0	N	0	N	1
MozF29	MozF29	Mozambique	Chibuto	2007	N	0	N	0	N	1
MozF35	MozF35	Mozambique	Chibuto	2007	N	0	N	0	N	1
MozF798	MozF798	Mozambique	Chibuto	2007	N	0	N	0	N	1
MozF804	MozF804	Mozambique	Chibuto	2007	N	0	N	0	N	0
TanF561	TanF561	Tanzania	Kayenze Bondeni	2012	N	1	N	1	N	1
TanF601	TanF601	Tanzania	Kayenze Bondeni	2012	N	0	N	0	N	0
Ugf399	UgF399	Uganda	Tororo Amoni	2001	N	0	N	2	N	2
Ugf401	UgF401	Uganda	Tororo Amoni	2001	N	0	N	2	N	2
Ugf403	UgF403	Uganda	Tororo Amoni	2001	N	1	N	1	N	2
Zam281	Zam281	Zambia	Nyimba	2011	N	1	N	2	N	2

## Sheet: dropped_specimens
VCF_ID	Specimen_ID	Country	Village	Date of collection	2Ra-cyt	3Ra-cyt	3Rb-cyt	2Ra-PCA	3Ra-PCA	3Rb-PCA
Bagre_02-07350_Kiribina	02-07350	Burkina Faso	Bagre	2002-12-17	0	0	0	None	None	None
Bagre_02-07358_Kiribina	02-07358	Burkina Faso	Bagre	2002-12-17	0	0	0	None	None	None
Dirze_02-06753_Kiribina	02-06753	Burkina Faso	Dirze	2002-12-14	0	0	0	None	None	None
Dirze_02-06897_Kiribina	02-06897	Burkina Faso	Dirze	2002-12-14	0	0	0	None	None	None
Dirze_02-07217_Kiribina	02-07217	Burkina Faso	Dirze	2002-12-14	0	0	0	None	None	None
Dirze_02-07223_Kiribina	02-07223	Burkina Faso	Dirze	2002-12-14	0	0	0	None	None	None
Dirze_02-07231_Kiribina	02-07231	Burkina Faso	Dirze	2002-12-14	0	0	0	None	None	None
Ipendo_01-05793_Folonzo	01-05793	Burkina Faso	Ipendo	2001-12-15	0	2	1	None	None	None
Kuiti_00-01518_Kiribina	00-01518	Burkina Faso	Kuiti	2000-09-11	0	0	0	None	None	None
Kuiti_00-04455_Folonzo	00-04455	Burkina Faso	Kuiti	2000-12-14	1	2	2	None	None	None
Kuiti_02-06221_Kiribina	02-06221	Burkina Faso	Kuiti	2002-12-02	0	0	0	None	None	None
La_02-07687_Folonzo	02-07687	Burkina Faso	La	2002-12-18	N	2	N	None	None	None
La_02-07703_Folonzo	02-07703	Burkina Faso	La	2002-12-18	1	2	2	None	None	None
Pehele_02-05628_Kiribina	02-05628	Burkina Faso	Pehele	2002-11-19	0	1	0	None	None	None
Pehele_02-06339_Kiribina	02-06339	Burkina Faso	Pehele	2002-12-07	0	0	0	None	None	None
Pehele_02-06341_Folonzo	02-06341	Burkina Faso	Pehele	2002-12-07	2	2	1	None	None	None
Pehele_02-06353_Kiribina	02-06353	Burkina Faso	Pehele	2002-12-07	0	0	0	None	None	None
Pehele_02-06363_Folonzo	02-06363	Burkina Faso	Pehele	2002-12-07	2	1	0	None	None	None
Pehele_02-06365_Kiribina	02-06365	Burkina Faso	Pehele	2002-12-07	0	0	0	None	None	None
Pehele_02-06371_Kiribina	02-06371	Burkina Faso	Pehele	2002-12-07	0	0	0	None	None	None
Pehele_02-06381_Kiribina	02-06381	Burkina Faso	Pehele	2002-12-07	0	0	0	None	None	None
Sabtenga_02-07119_Folonzo	02-07119	Burkina Faso	Sabtenga	2002-12-15	1	2	2	None	None	None
Sabtenga_02-07146_Folonzo	02-07146	Burkina Faso	Sabtenga	2002-12-15	2	2	2	None	None	None
Sabtenga_02-07195_Folonzo	02-07195	Burkina Faso	Sabtenga	2002-12-15	2	2	2	None	None	None
Vi_02-06673_Folonzo	02-06673	Burkina Faso	Vi	2002-12-11	N	2	N	None	None	None
Vi_02-06857_Folonzo	02-06857	Burkina Faso	Vi	2002-12-11	1	2	1	None	None	None
Vi_02-06859_Folonzo	02-06859	Burkina Faso	Vi	2002-12-11	2	2	0	None	None	None
Vi_02-06871_Folonzo	02-06871	Burkina Faso	Vi	2002-12-11	1	2	0	None	None	None
