# Supplementary material for: High-Throughput Genotyping of Common Chromosomal Inversions in the Afrotropical Malaria Mosquito Anopheles Funestus
Source: Insects. 2020 Oct 13;11(10):693. doi: 10.3390/insects11100693 (PMC7650614; doi:10.3390/insects11100693)
Supplement: Supplementary file 1 [file insects-11-00693-s001.zip › TableS2_validation_sample_29Sep2020.xlsx]

## Sheet: Sheet1
Table S2. Cytogenetically karyotyped mosquitoes used as the validation set in conjunction with Open Array (OA) and Amplicon Sequencing (AS) platforms. Genotypes are 0 (standard homozygote), 1 (heterozygote) and 2 (inverted homozygote).
SpecimenID	Date	Method	village	chromosomal form	3Ra_cyto	3Ra_amp	3Ra_oa	concat_3Ra	3Rb_cyto	3Rb_amp	3Rb_oa	concat_3Rb	2Ra_cyto	2Ra_amp	concat_2Ra	AS_callrates	OA_callrates
00-00021	2000-01-04	IRC	Koubri	Kiribina	0	Not sequenced	0	NA	0	Not sequenced	0	NA	0	Not sequenced	NA	NA	100
00-00022	2000-01-04	IRC	Koubri	Kiribina	0	0	0	000	0	0	0	000	0	0	00	100	100
00-00024	2000-01-04	IRC	Koubri	Kiribina	1	1	1	111	0	0	0	000	0	0	00	97.561	100
00-00025	2000-01-04	IRC	Koubri	Folonzo	1	1	1	111	2	2	2	222	0	0	00	89.0244	100
00-00029	2000-01-04	IRC	Koubri	Kiribina	0	0	0	000	0	0	0	000	0	0	00	97.561	100
00-00030	2000-01-04	IRC	Koubri	Kiribina	1	1	1	111	0	0	0	000	0	0	00	93.9024	100
00-00031	2000-01-04	IRC	Koubri	Kiribina	0	0	0	000	0	0	0	000	0	0	00	96.3415	100
00-00032	2000-01-04	IRC	Koubri	Folonzo	2	2	2	222	1	0	0	100	1	1	11	95.122	100
00-00033	2000-01-04	PIT	Noungou	Kiribina	0	0	0	000	0	0	0	000	0	0	00	98.7805	100
00-00038	2000-01-04	PIT	Koubri	Kiribina	0	0	0	000	0	0	0	000	0	0	00	100	100
00-00039	2000-01-04	PIT	Koubri	Kiribina	0	0	0	000	0	0	0	000	0	0	00	100	100
00-00041	2000-01-04	PIT	Koubri	Kiribina	1	1	1	111	0	0	0	000	0	0	00	95.122	100
00-00078	2000-01-05	IRC	Koubri	Kiribina	0	0	0	000	0	0	0	000	0	0	00	100	100
00-00079	2000-01-05	IRC	Koubri	Kiribina	0	0	0	000	0	0	0	000	0	0	00	98.7805	100
00-00080	2000-01-05	IRC	Koubri	Kiribina	0	0	0	000	0	0	0	000	0	0	00	100	100
00-00081	2000-01-05	IRC	Koubri	Kiribina	0	0	0	000	0	0	0	000	0	0	00	97.561	100
00-00082	2000-01-05	IRC	Koubri	Kiribina	0	0	0	000	0	0	0	000	0	0	00	97.561	100
00-00085	2000-01-05	IRC	Koubri	Kiribina	0	0	0	000	0	0	0	000	0	0	00	98.7805	96.2963
00-00087	2000-01-05	IRC	Koubri	Kiribina	0	Low callrate	0	NA	0	Low callrate	0	NA	0	Low callrate	NA	0	92.5926
00-00088	2000-01-05	IRC	Koubri	Kiribina	0	0	0	000	0	0	0	000	0	0	00	100	100
00-00093	2000-01-06	PIT	Koubri	Kiribina	0	0	0	000	0	0	0	000	0	0	00	100	100
00-00095	2000-01-06	PIT	Koubri	Folonzo	1	1	1	111	1	1	0	110	0	1	01	91.4634	100
00-00124	2000-01-06	IRC	Koubri	Kiribina	0	0	0	000	0	0	0	000	0	0	00	98.7805	100
00-00130	2000-01-07	PIT	Koubri	Kiribina	0	0	0	000	0	0	0	000	0	0	00	100	100
00-00134	2000-01-07	IRC	Koubri	Folonzo	2	2	1	221	0	1	1	011	0	0	00	93.9024	92.5926
00-00136	2000-01-07	IRC	Koubri	Folonzo	2	2	2	222	1	1	1	111	0	0	00	100	100
00-00139	2000-01-07	IRC	Koubri	Kiribina	0	0	0	000	0	0	0	000	0	0	00	98.7805	100
00-00140	2000-01-07	IRC	Koubri	Folonzo	2	2	2	222	0	1	1	011	1	1	11	95.122	100
00-00141	2000-01-07	IRC	Koubri	Folonzo	2	2	2	222	2	2	2	222	2	2	22	86.5854	100
00-00142	2000-01-07	IRC	Koubri	Kiribina	0	0	0	000	0	0	0	000	0	0	00	97.561	100
00-00143	2000-01-07	IRC	Koubri	Kiribina	0	0	0	000	0	0	0	000	0	0	00	98.7805	100
00-00145	2000-01-07	IRC	Koubri	Kiribina	0	0	0	000	0	0	0	000	0	0	00	98.7805	100
00-00146	2000-01-07	IRC	Koubri	Kiribina	0	0	0	000	0	0	0	000	0	0	00	100	100
00-00147	2000-01-07	IRC	Koubri	Kiribina	0	0	0	000	0	0	0	000	0	0	00	100	100
00-00175	2000-01-10	PIT	Koubri	Kiribina	1	1	1	111	0	0	0	000	0	2	02	92.6829	100
00-00176	2000-01-10	PIT	Koubri	Kiribina	0	0	0	000	0	0	0	000	0	0	00	98.7805	92.5926
00-00177	2000-01-10	PIT	Koubri	Kiribina	0	0	0	000	0	0	0	000	0	0	00	100	100
00-00184	2000-01-10	IRC	Koubri	Folonzo	2	2	2	222	1	1	1	111	0	1	01	96.3415	100
00-00185	2000-01-10	IRC	Koubri	Kiribina	0	1	1	011	0	1	1	011	0	0	00	96.3415	100
00-00186	2000-01-10	IRC	Koubri	Folonzo	2	2	2	222	0	0	0	000	0	0	00	98.7805	96.2963
00-00187	2000-01-10	IRC	Koubri	Folonzo	2	2	2	222	0	2	2	022	0	2	02	90.2439	100
00-00188	2000-01-10	IRC	Koubri	Kiribina	0	0	0	000	0	0	0	000	0	0	00	100	100
00-00189	2000-01-10	IRC	Koubri	Kiribina	0	0	0	000	0	0	0	000	0	0	00	100	100
00-00190	2000-01-10	IRC	Koubri	Kiribina	0	0	0	000	0	0	0	000	0	0	00	100	100
00-00191	2000-01-10	IRC	Koubri	Folonzo	1	1	1	111	0	0	0	000	1	1	11	92.6829	100
00-00192	2000-01-10	IRC	Koubri	Kiribina	0	0	0	000	0	0	0	000	0	0	00	100	100
00-00194	2000-01-10	IRC	Koubri	Kiribina	0	0	0	000	0	0	0	000	0	0	00	98.7805	100
00-00195	2000-01-10	IRC	Koubri	Kiribina	1	1	1	111	0	0	0	000	0	0	00	96.3415	100
00-00196	2000-01-10	IRC	Koubri	Kiribina	0	0	0	000	0	0	0	000	0	0	00	100	100
00-00197	2000-01-10	IRC	Koubri	Folonzo	2	2	2	222	1	0	0	100	1	1	11	96.3415	100
00-00198	2000-01-10	IRC	Koubri	Folonzo	2	2	2	222	2	2	2	222	0	0	00	93.9024	100
00-00199	2000-01-10	IRC	Koubri	Kiribina	0	0	0	000	0	0	0	000	0	0	00	100	100
00-00200	2000-01-10	IRC	Koubri	Kiribina	0	0	0	000	0	0	0	000	0	0	00	98.7805	100
00-00201	2000-01-10	IRC	Koubri	Kiribina	0	0	0	000	0	0	0	000	0	0	00	100	100
00-00202	2000-01-10	IRC	Koubri	Kiribina	0	0	0	000	0	0	0	000	0	0	00	98.7805	100
00-00229	2000-01-11	PIT	Koubri	Kiribina	0	0	0	000	0	0	0	000	0	0	00	100	100
00-00232	2000-01-11	PIT	Koubri	Folonzo	2	2	2	222	1	0	1	101	0	0	00	95.122	100
00-00261	2000-01-11	IRC	Koubri	Folonzo	2	2	2	222	1	0	1	101	No_cytoKaryotype	2	NA	91.4634	100
00-00262	2000-01-11	IRC	Koubri	Kiribina	0	0	0	000	1	0	0	100	0	0	00	100	100
00-00263	2000-01-11	IRC	Koubri	Kiribina	0	Low callrate	0	NA	0	Low callrate	0	NA	0	Low callrate	NA	62.1951	96.2963
00-00266	2000-01-11	IRC	Koubri	Kiribina	1	1	1	111	0	0	0	000	0	0	00	97.561	100
00-00267	2000-01-11	IRC	Koubri	Folonzo	2	2	2	222	0	2	2	022	0	2	02	90.2439	100
00-00268	2000-01-11	IRC	Koubri	Kiribina	0	0	0	000	0	0	0	000	0	0	00	100	100
00-00272	2000-01-11	IRC	Koubri	Kiribina	0	0	0	000	0	0	0	000	0	0	00	100	100
00-00275	2000-01-12	PIT	Koubri	Kiribina	0	0	0	000	0	0	0	000	0	0	00	97.561	100
00-00294	2000-01-12	IRC	Koubri	Folonzo	2	1	1	211	1	1	1	111	2	1	21	89.0244	100
00-01764	2000-09-28	IRC	Koubri	Kiribina	0	0	0	000	0	0	0	000	0	0	00	100	100
00-01765	2000-09-28	IRC	Koubri	Kiribina	0	0	0	000	0	0	0	000	0	0	00	98.7805	100
00-01766	2000-09-28	IRC	Koubri	Kiribina	0	0	0	000	0	0	0	000	0	0	00	97.561	100
00-02761	2000-10-25	PSC	Koubri	Kiribina	0	0	0	000	0	0	0	000	0	0	00	100	100
00-02764	2000-10-25	PSC	Koubri	Kiribina	0	0	0	000	0	0	0	000	0	0	00	97.561	100
00-02765	2000-10-25	PSC	Koubri	Folonzo	2	2	2	222	1	1	1	111	2	2	22	93.9024	100
00-02767	2000-10-25	PSC	Koubri	Folonzo	2	Not sequenced	2	NA	2	Not sequenced	2	NA	2	Not sequenced	NA	NA	100
00-02769	2000-10-25	PSC	Koubri	Kiribina	1	1	1	111	0	0	0	000	0	0	00	95.122	100
00-02794	2000-10-25	IRC	Koubri	Kiribina	0	0	0	000	0	0	0	000	0	0	00	97.561	100
00-02924	2000-11-03	PIT	Koubri	Kiribina	0	0	0	000	0	0	0	000	0	0	00	98.7805	100
00-02926	2000-11-03	PIT	Koubri	Kiribina	0	0	0	000	0	0	0	000	0	0	00	98.7805	100
00-02927	2000-11-03	PIT	Koubri	Kiribina	0	0	0	000	0	0	0	000	0	0	00	98.7805	100
00-02956	2000-11-04	PIT	Koubri	Kiribina	0	0	0	000	0	0	0	000	0	0	00	97.561	100
00-02957	2000-11-04	PIT	Koubri	Kiribina	0	0	0	000	0	0	0	000	0	0	00	100	100
00-02958	2000-11-04	PIT	Koubri	Kiribina	0	0	0	000	0	0	0	000	0	0	00	100	100
00-02961	2000-11-06	PIT	Koubri	Kiribina	0	0	0	000	0	0	0	000	0	0	00	98.7805	100
00-02975	2000-11-08	PSC	Koubri	Folonzo	2	Not sequenced	2	NA	2	Not sequenced	2	NA	No_cytoKaryotype	Not sequenced	NA	NA	100
00-02976	2000-11-08	PSC	Koubri	Folonzo	2	1	1	211	2	2	2	222	2	0	20	91.4634	100
00-02977	2000-11-08	PSC	Koubri	Kiribina	0	0	0	000	0	0	0	000	0	0	00	100	100
00-02978	2000-11-08	PSC	Koubri	Kiribina	0	0	0	000	0	0	0	000	0	0	00	97.561	100
00-02980	2000-11-08	PSC	Koubri	Kiribina	0	0	0	000	0	0	0	000	0	0	00	98.7805	100
00-02981	2000-11-08	PSC	Koubri	Kiribina	0	0	0	000	0	0	0	000	0	0	00	98.7805	100
00-02982	2000-11-08	PSC	Koubri	Kiribina	0	0	0	000	0	0	0	000	0	0	00	100	100
00-02983	2000-11-08	PSC	Koubri	Kiribina	0	0	0	000	1	1	0	110	0	0	00	96.3415	100
00-02984	2000-11-08	PSC	Koubri	Folonzo	1	1	1	111	2	2	2	222	0	2	02	84.1463	100
00-02985	2000-11-08	PSC	Koubri	Folonzo	2	Low callrate	2	NA	1	Low callrate	0	NA	No_cytoKaryotype	Low callrate	NA	62.1951	100
00-02987	2000-11-08	PSC	Koubri	Kiribina	0	2	2	022	0	1	0	010	0	0	00	93.9024	100
00-02988	2000-11-08	PSC	Koubri	Kiribina	0	0	0	000	0	0	0	000	0	0	00	100	100
00-02989	2000-11-08	PSC	Koubri	Folonzo	2	0	0	200	0	0	0	000	No_cytoKaryotype	0	NA	100	100
00-02991	2000-11-08	PSC	Koubri	Kiribina	0	0	0	000	0	0	0	000	0	0	00	97.561	100
00-02994	2000-11-08	PSC	Koubri	Kiribina	0	0	0	000	0	0	0	000	0	0	00	100	100
00-02997	2000-11-07	PIT	Koubri	Kiribina	0	0	0	000	0	0	0	000	0	0	00	100	100
00-03144	2000-11-07	PIT	Kuiti	Kiribina	0	0	0	000	0	0	0	000	0	0	00	98.7805	100
00-03301	2000-11-08	PSC	Kuiti	Kiribina	0	0	0	000	0	0	0	000	0	0	00	100	100
01-00006	2001-01-02	IRC	Kuiti	Kiribina	0	0	0	000	0	0	0	000	0	0	00	100	96.2963
01-00007	2001-01-02	IRC	Kuiti	Kiribina	0	0	0	000	0	0	0	000	0	0	00	100	100
01-00009	2001-01-02	IRC	Kuiti	Kiribina	0	0	0	000	0	0	0	000	0	0	00	100	100
01-00010	2001-01-02	IRC	Kuiti	Kiribina	0	0	0	000	0	0	0	000	0	0	00	98.7805	100
01-00072	2001-01-04	IRC	Kuiti	Kiribina	0	0	0	000	0	0	0	000	0	0	00	100	100
01-00073	2001-01-04	IRC	Kuiti	Folonzo	2	2	2	222	2	1	0	210	0	2	02	90.2439	100
01-00074	2001-01-04	IRC	Kuiti	Kiribina	0	0	0	000	0	0	0	000	0	0	00	100	100
01-00209	2001-01-05	IRC	Kuiti	Kiribina	0	0	0	000	0	0	0	000	0	0	00	100	100
01-00211	2001-01-05	IRC	Kuiti	Kiribina	0	0	0	000	0	0	0	000	0	0	00	100	100
01-00212	2001-01-05	IRC	Kuiti	Kiribina	0	0	0	000	0	0	0	000	0	0	00	100	100
01-00214	2001-01-05	IRC	Kuiti	Kiribina	0	0	0	000	0	0	0	000	0	0	00	98.7805	100
01-00216	2001-01-05	IRC	Kuiti	Kiribina	0	0	0	000	0	0	0	000	0	0	00	100	100
01-00217	2001-01-05	IRC	Kuiti	Folonzo	2	2	2	222	1	1	1	111	1	1	11	96.3415	100
01-00218	2001-01-05	IRC	Kuiti	Kiribina	0	0	0	000	0	0	0	000	0	0	00	100	100
01-00219	2001-01-05	IRC	Kuiti	Kiribina	0	0	0	000	0	0	0	000	0	0	00	98.7805	100
01-00220	2001-01-05	IRC	Kuiti	Kiribina	0	0	0	000	0	0	0	000	0	0	00	100	100
01-00224	2001-01-05	IRC	Kuiti	Kiribina	0	0	0	000	0	0	0	000	0	0	00	93.9024	100
01-00225	2001-01-05	IRC	Kuiti	Folonzo	2	1	1	211	0	0	0	000	No_cytoKaryotype	0	NA	97.561	100
01-00226	2001-01-05	IRC	Kuiti	Kiribina	0	0	0	000	0	0	0	000	0	0	00	100	100
01-00227	2001-01-05	IRC	Kuiti	Kiribina	0	0	0	000	0	0	0	000	0	0	00	100	100
01-00282	2001-01-08	IRC	Kuiti	Kiribina	0	0	0	000	0	0	0	000	0	0	00	100	100
01-00284	2001-01-08	IRC	Kuiti	Folonzo	2	0	0	200	2	0	0	200	2	0	20	100	100
01-00286	2001-01-08	IRC	Kuiti	Folonzo	2	0	0	200	1	0	0	100	1	0	10	100	100
01-00287	2001-01-08	IRC	Kuiti	Kiribina	0	0	0	000	0	0	0	000	0	0	00	98.7805	100
01-00288	2001-01-08	IRC	Kuiti	Folonzo	2	0	0	200	1	0	0	100	0	0	00	97.561	100
01-00290	2001-01-08	IRC	Kuiti	Kiribina	0	0	0	000	0	0	0	000	0	0	00	98.7805	100
01-00291	2001-01-08	IRC	Kuiti	Folonzo	2	0	0	200	1	0	0	100	1	0	10	98.7805	100
01-00292	2001-01-08	IRC	Kuiti	Kiribina	0	0	0	000	0	0	0	000	0	0	00	100	100
01-00294	2001-01-08	IRC	Kuiti	Kiribina	0	2	2	022	0	2	1	021	0	2	02	89.0244	100
01-00295	2001-01-08	IRC	Kuiti	Kiribina	1	1	1	111	0	1	1	011	0	0	00	91.4634	100
01-00297	2001-01-08	IRC	Kuiti	Kiribina	0	0	0	000	0	0	0	000	0	0	00	98.7805	100
01-00299	2001-01-08	IRC	Kuiti	Folonzo	2	2	2	222	2	2	2	222	1	1	11	92.6829	100
01-00300	2001-01-08	IRC	Kuiti	Folonzo	2	2	2	222	1	0	0	100	1	2	12	91.4634	100
01-00431	2001-01-09	IRC	Kuiti	Kiribina	0	0	0	000	0	0	0	000	0	0	00	100	100
01-00432	2001-01-09	IRC	Kuiti	Folonzo	1	1	1	111	0	1	0	010	2	2	22	87.8049	100
01-00433	2001-01-09	IRC	Kuiti	Folonzo	2	2	2	222	2	2	1	221	1	1	11	91.4634	96.2963
01-00434	2001-01-09	IRC	Kuiti	Kiribina	0	0	0	000	0	0	0	000	0	0	00	100	100
01-00435	2001-01-09	IRC	Kuiti	Kiribina	0	0	0	000	0	0	0	000	0	0	00	100	100
01-00454	2001-01-09	IRC	Kuiti	Kiribina	0	0	0	000	0	0	0	000	0	0	00	100	100
01-00455	2001-01-09	IRC	Kuiti	Kiribina	0	0	0	000	0	0	0	000	1	0	10	100	100
01-00456	2001-01-09	IRC	Kuiti	Folonzo	2	Low callrate	0	NA	1	Low callrate	0	NA	1	Low callrate	NA	0	81.4815
01-00457	2001-01-09	IRC	Kuiti	Kiribina	0	0	0	000	0	0	0	000	0	0	00	96.3415	100
01-00458	2001-01-09	IRC	Kuiti	Folonzo	1	1	1	111	1	1	0	110	0	0	00	92.6829	100
01-00511	2001-01-10	PSC	Kuiti	Kiribina	0	0	0	000	0	0	0	000	0	0	00	98.7805	100
01-00512	2001-01-10	PSC	Kuiti	Kiribina	0	0	0	000	0	0	0	000	1	0	10	100	100
01-00514	2001-01-10	PSC	Kuiti	Kiribina	0	0	0	000	0	0	0	000	0	0	00	100	100
01-00516	2001-01-10	PSC	Kuiti	Kiribina	0	0	0	000	0	0	0	000	0	0	00	100	100
01-00517	2001-01-10	PSC	Kuiti	Kiribina	0	0	0	000	0	0	0	000	0	0	00	100	100
01-00518	2001-01-10	PSC	Kuiti	Kiribina	0	0	0	000	0	0	0	000	0	0	00	100	100
01-00541	2001-01-15	IRC	Kuiti	Kiribina	0	0	0	000	0	0	0	000	0	0	00	100	100
01-00542	2001-01-15	IRC	Kuiti	Kiribina	0	0	0	000	0	0	0	000	0	0	00	98.7805	100
01-00544	2001-01-15	IRC	Kuiti	Kiribina	0	0	0	000	0	0	0	000	0	0	00	100	100
01-00545	2001-01-15	IRC	Kuiti	Kiribina	1	1	1	111	0	0	0	000	0	0	00	93.9024	100
01-00566	2001-01-21	IRC	Kuiti	Folonzo	1	1	1	111	0	0	0	000	1	1	11	92.6829	100
01-00567	2001-01-21	IRC	Kuiti	Kiribina	0	0	0	000	0	0	0	000	1	0	10	100	100
01-00568	2001-01-21	IRC	Kuiti	Kiribina	0	0	0	000	0	0	0	000	0	0	00	98.7805	100
01-00569	2001-01-21	IRC	Kuiti	Kiribina	0	0	0	000	0	0	0	000	0	0	00	100	100
01-00696	2001-01-23	IRC	Kuiti	Folonzo	2	2	2	222	1	1	1	111	1	1	11	89.0244	100
01-00697	2001-01-23	IRC	Kuiti	Kiribina	0	0	0	000	0	0	0	000	0	0	00	98.7805	100
01-00698	2001-01-23	IRC	Kuiti	Kiribina	0	1	1	011	0	0	0	000	0	2	02	92.6829	100
01-00824	2001-01-23	IRC	Kuiti	Kiribina	0	0	0	000	0	0	0	000	0	0	00	98.7805	100
01-00825	2001-01-23	IRC	Kuiti	Kiribina	0	0	0	000	0	0	0	000	0	0	00	100	100
01-00826	2001-01-23	IRC	Kuiti	Kiribina	0	0	0	000	0	0	0	000	0	0	00	98.7805	100
01-00827	2001-01-23	IRC	Kuiti	Kiribina	0	0	0	000	0	0	0	000	0	0	00	100	100
01-00828	2001-01-23	IRC	Kuiti	Kiribina	0	1	1	011	0	0	0	000	0	0	00	91.4634	100
01-01032	2001-01-30	IRC	Kuiti	Kiribina	0	0	0	000	0	0	0	000	0	0	00	98.7805	100
01-01033	2001-01-30	IRC	Kuiti	Kiribina	0	0	0	000	0	0	0	000	0	0	00	100	100
01-01034	2001-01-30	IRC	Kuiti	Kiribina	0	0	0	000	0	0	0	000	0	0	00	100	100
01-01035	2001-01-30	IRC	Kuiti	Kiribina	0	Low callrate	0	NA	0	Low callrate	0	NA	0	Low callrate	NA	79.2683	100
01-04808	2001-12-05	PIT	Koubri	Kiribina	0	0	0	000	0	0	0	000	0	0	00	98.7805	100
01-04809	2001-12-06	PIT	Koubri	Kiribina	0	0	0	000	0	0	0	000	0	0	00	95.122	100
01-04810	2001-12-06	PIT	Koubri	Kiribina	0	0	0	000	0	0	0	000	0	0	00	98.7805	100
01-04982	2001-12-07	IRC	Kuiti	Kiribina	0	0	0	000	0	0	0	000	0	0	00	96.3415	100
01-04984	2001-12-07	IRC	Kuiti	Folonzo	2	2	2	222	1	1	1	111	1	1	11	96.3415	100
01-04985	2001-12-07	IRC	Kuiti	Folonzo	2	2	2	222	1	1	1	111	0	0	00	91.4634	100
01-04986	2001-12-07	IRC	Kuiti	Folonzo	2	2	2	222	0	0	0	000	2	2	22	96.3415	100
01-04987	2001-12-07	IRC	Kuiti	Kiribina	0	0	0	000	0	0	0	000	0	0	00	100	100
01-04988	2001-12-07	IRC	Kuiti	Kiribina	0	0	0	000	0	0	0	000	0	0	00	100	100
01-04989	2001-12-07	IRC	Kuiti	Kiribina	0	0	0	000	0	0	0	000	0	0	00	98.7805	100
01-04990	2001-12-07	IRC	Kuiti	Kiribina	0	0	0	000	0	0	0	000	0	0	00	98.7805	100
01-04991	2001-12-07	IRC	Kuiti	Kiribina	0	0	0	000	0	0	0	000	0	0	00	100	100
01-04992	2001-12-07	IRC	Kuiti	Kiribina	0	0	0	000	0	0	0	000	0	0	00	97.561	100
01-04993	2001-12-07	IRC	Kuiti	Folonzo	2	2	2	222	No_cytoKaryotype	1	0	NA	2	2	22	92.6829	100
02-06024	2002-12-02	HBC-in	Koubri	Folonzo	2	2	2	222	1	1	0	110	2	2	22	92.6829	100
02-06025	2002-12-02	HBC-in	Koubri	Folonzo	2	2	2	222	2	2	2	222	2	2	22	93.9024	100
02-06026	2002-12-02	HBC-in	Koubri	Folonzo	2	0	0	200	2	0	0	200	1	0	10	98.7805	100
02-06028	2002-12-02	HBC-in	Koubri	Folonzo	1	1	1	111	1	1	1	111	0	2	02	91.4634	100
02-06030	2002-12-02	HBC-in	Koubri	Folonzo	2	2	2	222	0	2	2	022	1	1	11	90.2439	100
02-06032	2002-12-02	HBC-out	Koubri	Folonzo	1	1	1	111	2	2	2	222	2	2	22	84.1463	96.2963
02-06033	2002-12-02	HBC-out	Koubri	Folonzo	2	2	2	222	1	0	0	100	1	1	11	92.6829	100
02-06034	2002-12-02	HBC-out	Koubri	Folonzo	1	1	1	111	1	1	1	111	2	2	22	89.0244	100
02-06039	2002-12-02	HBC-out	Koubri	Folonzo	2	2	2	222	1	1	0	110	No_cytoKaryotype	1	NA	96.3415	100
02-06043	2002-12-02	HBC-out	Koubri	Folonzo	2	2	2	222	0	2	2	022	0	0	00	97.561	100
02-06044	2002-12-02	HBC-out	Koubri	Folonzo	2	2	2	222	0	0	0	000	1	1	11	98.7805	100
02-06045	2002-12-02	HBC-out	Koubri	Folonzo	2	2	2	222	1	1	0	110	0	0	00	96.3415	100
02-06046	2002-12-02	HBC-out	Koubri	Folonzo	2	2	2	222	2	2	2	222	1	1	11	91.4634	100
02-06047	2002-12-02	HBC-out	Koubri	Folonzo	2	2	2	222	1	1	1	111	0	0	00	100	100
02-06048	2002-12-02	HBC-out	Koubri	Folonzo	2	2	2	222	0	0	0	000	2	2	22	97.561	100
02-06049	2002-12-02	HBC-out	Koubri	Folonzo	1	1	1	111	1	1	1	111	1	0	10	92.6829	100
02-06101	2002-12-03	HBC-out	Kuiti	Folonzo	2	2	2	222	2	2	2	222	1	1	11	92.6829	100
02-06275	2002-12-04	IRC	Kuiti	Folonzo	1	1	1	111	1	1	1	111	0	0	00	96.3415	100
02-06277	2002-12-04	IRC	Kuiti	Folonzo	1	1	1	111	0	0	0	000	2	2	22	92.6829	100
02-06278	2002-12-03	HBC-in	Kuiti	Folonzo	1	1	1	111	1	0	1	101	2	2	22	87.8049	100
02-06285	2002-12-03	HBC-in	Kuiti	Folonzo	2	2	2	222	2	0	0	200	2	2	22	96.3415	100
02-06286	2002-12-03	HBC-in	Kuiti	Folonzo	2	2	2	222	2	2	2	222	1	1	11	91.4634	100
02-06288	2002-12-03	HBC-out	Kuiti	Folonzo	2	2	2	222	0	0	0	000	0	2	02	92.6829	100
02-06289	2002-12-03	HBC-out	Kuiti	Folonzo	2	2	2	222	0	0	0	000	0	0	00	98.7805	100
02-06290	2002-12-03	HBC-out	Kuiti	Folonzo	2	2	2	222	0	1	0	010	0	2	02	96.3415	100
02-06291	2002-12-03	HBC-out	Kuiti	Folonzo	1	1	1	111	0	0	0	000	2	0	20	95.122	100
02-06293	2002-12-03	HBC-out	Kuiti	Folonzo	2	2	2	222	No_cytoKaryotype	2	2	NA	2	2	22	90.2439	96.2963
02-06304	2002-12-04	HBC-in	Koubri	Folonzo	2	2	2	222	1	1	1	111	1	1	11	92.6829	100
02-06308	2002-12-04	HBC-in	Koubri	Folonzo	2	2	2	222	1	0	1	101	0	0	00	98.7805	100
02-06309	2002-12-04	HBC-in	Koubri	Folonzo	2	2	2	222	1	1	1	111	1	1	11	95.122	100
02-06310	2002-12-04	HBC-out	Koubri	Folonzo	No_cytoKaryotype	1	1	NA	0	0	0	000	2	2	22	89.0244	100
02-06311	2002-12-04	HBC-out	Koubri	Folonzo	2	2	2	222	2	2	1	221	2	2	22	92.6829	96.2963
02-06314	2002-12-04	HBC-out	Koubri	Folonzo	1	1	1	111	0	0	0	000	1	1	11	96.3415	96.2963
02-06315	2002-12-04	HBC-out	Koubri	Folonzo	2	2	2	222	1	1	1	111	1	1	11	91.4634	100
02-06316	2002-12-04	HBC-out	Koubri	Folonzo	2	2	2	222	1	1	0	110	1	1	11	97.561	96.2963
02-06318	2002-12-04	HBC-out	Koubri	Folonzo	2	2	2	222	2	2	2	222	1	1	11	93.9024	100
02-06319	2002-12-04	HBC-out	Koubri	Folonzo	2	2	2	222	2	0	0	200	2	2	22	92.6829	100
02-06320	2002-12-04	HBC-out	Koubri	Folonzo	2	2	2	222	0	0	0	000	2	2	22	97.561	100
02-06323	2002-12-04	HBC-out	Koubri	Folonzo	2	2	2	222	1	1	1	111	2	2	22	92.6829	100
02-06325	2002-12-04	HBC-out	Koubri	Folonzo	1	1	1	111	2	2	2	222	2	2	22	85.3659	100
02-06326	2002-12-04	HBC-out	Koubri	Folonzo	2	2	2	222	No_cytoKaryotype	2	2	NA	0	0	00	93.9024	100
02-06328	2002-12-04	HBC-out	Koubri	Folonzo	2	2	2	222	1	1	1	111	1	1	11	93.9024	100
02-06330	2002-12-04	HBC-out	Koubri	Folonzo	2	2	2	222	2	2	2	222	1	1	11	96.3415	100
02-06332	2002-12-04	HBC-out	Koubri	Folonzo	2	0	0	200	No_cytoKaryotype	0	0	NA	1	0	10	98.7805	100
02-06335	2002-12-04	HBC-out	Koubri	Folonzo	0	0	0	000	0	0	0	000	2	0	20	100	100
02-07769	2002-12-23	HBC-in	Kuiti	Folonzo	2	2	2	222	2	2	2	222	1	1	11	93.9024	100
02-07770	2002-12-23	HBC-in	Kuiti	Folonzo	2	2	2	222	0	0	0	000	2	2	22	93.9024	100
02-07773	2002-12-23	HBC-in	Kuiti	Folonzo	2	2	2	222	No_cytoKaryotype	2	2	NA	1	1	11	92.6829	100
02-07775	2002-12-23	HBC-in	Kuiti	Folonzo	2	2	2	222	1	1	0	110	1	1	11	93.9024	100
02-07776	2002-12-23	HBC-in	Kuiti	Folonzo	2	2	2	222	1	1	0	110	1	0	10	96.3415	100
05-00012	2005-01-31	OBET	Koubri	Folonzo	1	1	1	111	0	0	0	000	1	1	11	93.9024	100
05-00016	2005-01-31	OBET	Koubri	Folonzo	2	0	0	200	1	1	0	110	1	0	10	97.561	100
05-00644	2005-12-16	PSC	Koubri	Folonzo	2	0	0	200	0	0	0	000	2	0	20	100	100
05-00652	2005-12-16	PSC	Koubri	Folonzo	2	2	2	222	2	2	2	222	0	1	01	90.2439	100
05-00665	2005-12-16	PSC	Koubri	Folonzo	2	2	2	222	0	2	2	022	1	0	10	95.122	100
IRC, indoor resting catch; PIT, pit trap; PSC, insecticide spray-sheet catch; HBC, human-baited catch; OBET, odor-baited entry trap.
