# Supplementary material for: High-Throughput Genotyping of Common Chromosomal Inversions in the Afrotropical Malaria Mosquito Anopheles Funestus
Source: Insects. 2020 Oct 13;11(10):693. doi: 10.3390/insects11100693 (PMC7650614; doi:10.3390/insects11100693)
Supplement: Supplementary file 1 [file insects-11-00693-s001.zip › TableS3_OA_Designs_092820.xlsx]

## Sheet: Assay_Info_Custom_TaqMan_SNP_Sa
Table S3. Open Array Assay Designs for inversions 3Ra and 3Rb.
Inversion	AfunF3 Position	Ref	Alt	Forward Primer (5'>3')	Reverse Primer (5'>3')	Probe_Ref (5'>3')	Probe_Alt (5'>3')
3Ra	2006341	C	T	ACTTTCTTCTACACACGTGTGGTT	TCCAATCGAGAAACAAAGATGTTACCA	ACGTTAGCTGTAGGTCCGAA	CGTTAGCTGTAGATCCGAA
3Ra	2053347	T	G	GTAGAGAGACATTGATGGGTGGAAA	CACTGCAGGCCGGATGT	CGATTCTGGAGATTTTTAAT	ATTCTGGAGCTTTTTAAT
3Ra	2094697	C	G	GCTGGACTGATGACAGAAACGT	TGTCAGACAGTCAGAACCACAAAAT	CGATACCTTCAGCACCGC	CGATACCTTCACCACCGC
3Ra	2099165	A	T	CGTCTTGGTCGGCTTCCT	GGCAAACAACGTAGACTCAAACC	CGATATCACAACACCATTC	CGATATCACAACTCCATTC
3Ra	2486161	A	C	GGGATAACGGACTCGGTAAACT	TCTGTCAGGCGACCAATAAGC	CCTCCGCATCACCCA	CCTCCGCCTCACCCA
3Ra	3501445	C	G	GCACGTCATGCAACATTTAAAAGC	TAGTACTTCATTTGTCCAATTTGTTTTATGTTTT	TTTATGTTGTTCTTGTTCTATG	TTTATGTTGTTCTTCTTCTATG
3Ra	4225683	G	A	AGTGGTCTTGCTTAATGACAAAGTGA	GTCAGTACGAAGGGTCACGTT	TTACGTGACGCATTTC	TACGTGACACATTTC
3Ra	6685962	T	C	CGATTAATTCCTTTGCTCAGCTTTAGT	AGAATCCGCAAGCAGCAGTAA	TTGCTGTCATTAGATTTACTA	TGCTGTCATTAGATCTACTA
3Ra	7863664	C	T	GGTGAATGGTGATGAAAATTGTTTGTGT	TGGAATGGAATAATTTAGAGCAAAAAAAATACGAA	TTTAAGCTTGGAAGATCA	TTTAAGCTTGAAAGATCA
3Ra	8290510	T	G	CACCACGTACACCGTCGTA	GTGGTGCAGGGCAATCTG	CAGTACACGCAGCAACA	AGTACACGCCGCAACA
3Ra	9517786	T	C	TCTGCTACTATGCAAATGCTCATGA	GCCTCGTTGCAGAAAACATTCAC	CGGGCCTTTTCTGC	CGGGCCTCTTCTGC
3Ra	10488834	C	T	GCAAATTGCGCATTTAGTCTACGA	GATGGAGCACGCTTGAATGC	TGGATCGTGCGAAATT	ATGGATCGTACGAAATT
3Ra	10801017	T	A	TGCATCCACTTTCGATGACACA	CCGCCGGTTCAAATGTTACAAAC	TCTCGACCGTATCTTT	TCGACCGAATCTTT
3Ra	10858954	C	T	TGATTTCGCTACCGACTGGTT	TGCTTTCCCGTTAAGATATTAACTAATCTGA	CTGGCTCACGTACATC	TGGCTCACATACATC
3Ra	10997578	C	G	GCTAAGCTGCGGTAAGATTCTACAC	CCCTTCAGCTTGATGTCAAACGA	TAGACCAAACTGAACTGG	TAGACCAAACTCAACTGG
3Rb	21755684	C	A	CGATGTGTCTCATCAGTTTAAAATGGA	TCACATTTCAAATTATATTTCAGATTTCCGAACATC	CAACACTTTCCAAATAA	CAACACTTTCAAAATAA
3Rb	21854515	G	A	GCATGATCCGCATCTGATTAATGGT	GTGATTTGCAAAACCGTAAGACGTT	AAGCCCCTGGTGAGCA	AAGCCCCTAGTGAGCA
3Rb	21894270	C	T	ATTGTGCTTTTGTTTCCATTTTTATGAATTGG	CGAAGATATTTGTATTTCTCGGAAAACCT	ACCTATGTAAGTAGCAAAAA	CCTATGTAAGTAACAAAAA
3Rb	22631746	A	G	ACACGGATACGGATGTTGTTCTTT	GCATTTCTGCTGTTGCTACCA	ACGCTACAAAATTTAGTCTC	CGCTACAAAATCTAGTCTC
3Rb	23021477	T	C	CATTGGTTCGCGCATGTGATATAAC	ACTAGGTCGCACGGTACGAT	CAACGGAAAGATTATTTT	AACGGAAAGACTATTTT
3Rb	23280705	A	G	AGGGAAATTCTATAAAATACAACGTACAGCAA	TTCCTCAAAAATTGTTGCACAACTATGA	ATTTTTCGCTTTACAAAAC	TTTCGCTTTGCAAAAC
3Rb	26753449	G	A	TCGGCACGATGGATCTCAAC	CGCATCGGCCGTACTTG	CTTGCGCAGTTGCCT	TTGCGCAATTGCCT
3Rb	28550180	C	T	GAGATGGATGTAAAGTGAGGTTAGCA	GCTGGTCACTGCAGAAATCATCA	CTTTTCTTTCCATTTTTG	TTCTTTTCTTTCTATTTTTG
3Rb	28554164	T	C	CCACTCGATTTAATCAATTGTCCTTTTACTT	CTGGTTTGTTGCGTTATTCGATACT	TCCCGGACTTATCTGC	CCGGACCTATCTGC
3Rb	29210802	A	T	GAAACGCTCACGTCATGCAATATAA	ATCGTGTACGATTCTTGCCTAAACT	AGATGCCGCTCGAGTAT	ATGCCGCACGAGTAT
3Rb	30037802	C	G	ACTACATTAGCTAGAAAAATGGTCTTAAATCAC	CGGTTTCGTTTTCGGTTTGC	CCTAGAACGCCAAAGTA	CTAGAACGGCAAAGTA
3Rb	30661948	T	C	AAATTTCGAACTGCAAACCGTGAA	CGTCCACAGAACGTGAAATGATAAA	CTGTTTAGTAAATTGAAACTT	TGTTTAGTAAATCGAAACTT
