# Supplementary material for: High-Throughput Genotyping of Common Chromosomal Inversions in the Afrotropical Malaria Mosquito Anopheles Funestus
Source: Insects. 2020 Oct 13;11(10):693. doi: 10.3390/insects11100693 (PMC7650614; doi:10.3390/insects11100693)
Supplement: Supplementary file 1 [file insects-11-00693-s001.zip › TableS4_AS_Designs_091020_BL.xlsx]

## Sheet: Sheet1
Table S4. Amplicon sequencing assay designs for inversions 2Ra, 3Ra, and 3Rb.
Inversion	Tag SNP	REF	ALT	Primer_F Name	Primer_F Sequence (5'>3')	Primer_R Name	Primer_R Sequence (5'>3')
2Ra	2R_26087506_a	G	A	2R_26087506_a_F	CTACACGTTCAGAGTTCTACAGTCCGAACCGATGTATTGGGCTCTGC	2R_26087506_a_R	GTGACTGGAGTTCAGACGTGTGCTCTTCCGATCTACATTCGAACACCAAACGCA
2Ra	2R_26111277_a	A	T	2R_26111277_a_F	CTACACGTTCAGAGTTCTACAGTCCGAACAACGAGGCATTGAAAAAAGC	2R_26111277_a_R	GTGACTGGAGTTCAGACGTGTGCTCTTCCGATCTTCTGTCTCTCACAAACACAGGT
2Ra	2R_26212609_a	G	T	2R_26212609_a_F	CTACACGTTCAGAGTTCTACAGTCCGATGCATTCGATGTTTAGTGCGG	2R_26212609_a_R	GTGACTGGAGTTCAGACGTGTGCTCTTCCGATCTGCTCGCTGGACGTTTCGTA
2Ra	2R_26213556_a	A	G	2R_26213556_a_F	CTACACGTTCAGAGTTCTACAGTCCGAAACGATATCACCGCCCAAAC	2R_26213556_a_R	GTGACTGGAGTTCAGACGTGTGCTCTTCCGATCTTGCAAGCAACTGGTGAATCC
2Ra	2R_26558370_a	T	C	2R_26558370_a_F	CTACACGTTCAGAGTTCTACAGTCCGAACCCAGAATCGAAACGGCTT	2R_26558370_a_R	GTGACTGGAGTTCAGACGTGTGCTCTTCCGATCTCCTCATGGCTGGATGGGTTT
2Ra	2R_26854967_a	G	C	2R_26854967_a_F	CTACACGTTCAGAGTTCTACAGTCCGACACTCATATTCGGTTCGGTTTCG	2R_26854967_a_R	GTGACTGGAGTTCAGACGTGTGCTCTTCCGATCTAACGGCTAGGTGTGGCTTAC
2Ra	2R_26856512_a	C	G	2R_26856512_a_F	CTACACGTTCAGAGTTCTACAGTCCGACCGCGCTAAGCTACACAGTA	2R_26856512_a_R	GTGACTGGAGTTCAGACGTGTGCTCTTCCGATCTAGCATGCTGGTACGGTACAC
2Ra	2R_26945231_a	G	T	2R_26945231_a_F	CTACACGTTCAGAGTTCTACAGTCCGATACCCCGTTCGGTAAAGCG	2R_26945231_a_R	GTGACTGGAGTTCAGACGTGTGCTCTTCCGATCTCACGAACACGAATATTGCCGT
2Ra	2R_27077779_a	T	C	2R_27077779_a_F	CTACACGTTCAGAGTTCTACAGTCCGAACGACTCATGCCCGTGATG	2R_27077779_a_R	GTGACTGGAGTTCAGACGTGTGCTCTTCCGATCTACGACCAACAACCGGATACA
2Ra	2R_27112522_a	G	A	2R_27112522_a_F	CTACACGTTCAGAGTTCTACAGTCCGAACTGGGCGGTAAATATTTGCG	2R_27112522_a_R	GTGACTGGAGTTCAGACGTGTGCTCTTCCGATCTATTTGGGGTATCCATTCCTCAA
2Ra	2R_27324657_a	T	G	2R_27324657_a_F	CTACACGTTCAGAGTTCTACAGTCCGAATCTTGCGGTGCTTTTGGTT	2R_27324657_a_R	GTGACTGGAGTTCAGACGTGTGCTCTTCCGATCTGCGGGTACTGGTGGATGTTT
2Ra	2R_27479538_a	G	C	2R_27479538_a_F	CTACACGTTCAGAGTTCTACAGTCCGATGGAACAGATACTGTCCAAGCA	2R_27479538_a_R	GTGACTGGAGTTCAGACGTGTGCTCTTCCGATCTTGTTACACAACGAAACAAACGA
2Ra	2R_28817123_a	G	C	2R_28817123_a_F	CTACACGTTCAGAGTTCTACAGTCCGATGTAATACTTTCACGACAAACACC	2R_28817123_a_R	GTGACTGGAGTTCAGACGTGTGCTCTTCCGATCTTGTGTCCGTTCTTTCCAGGG
2Ra	2R_29136350_a	G	A	2R_29136350_a_F	CTACACGTTCAGAGTTCTACAGTCCGACCGATGCTCTGCGATCGATA	2R_29136350_a_R	GTGACTGGAGTTCAGACGTGTGCTCTTCCGATCTTGCCCATAGAACGTCTGCTT
2Ra	2R_31188519_a	C	A	2R_31188519_a_F	CTACACGTTCAGAGTTCTACAGTCCGAGCGAAGAACTCCTTTTCTCGC	2R_31188519_a_R	GTGACTGGAGTTCAGACGTGTGCTCTTCCGATCTACCCTTCCTCTTTCTGGTTCT
2Ra	2R_31378832_a	C	G	2R_31378832_a_F	CTACACGTTCAGAGTTCTACAGTCCGAGCCGTAAAATTATGAATTTTCCAGC	2R_31378832_a_R	GTGACTGGAGTTCAGACGTGTGCTCTTCCGATCTCGCTACCAAAAAGCCGTCTT
2Ra	2R_31580397_a	G	T	2R_31580397_a_F	CTACACGTTCAGAGTTCTACAGTCCGATGTCTGGGAGCTTTGCAAGT	2R_31580397_a_R	GTGACTGGAGTTCAGACGTGTGCTCTTCCGATCTCGGTGCAAAGTCAATTCGTT
2Ra	2R_31885583_a	G	C	2R_31885583_a_F	CTACACGTTCAGAGTTCTACAGTCCGAAAATGAACGACGCGACCACC	2R_31885583_a_R	GTGACTGGAGTTCAGACGTGTGCTCTTCCGATCTTGGTCTCTTAGTACGTATAGCCG
2Ra	2R_31970251_a	C	A	2R_31970251_a_F	CTACACGTTCAGAGTTCTACAGTCCGACGTCATCAAGACCGGTCCAT	2R_31970251_a_R	GTGACTGGAGTTCAGACGTGTGCTCTTCCGATCTTCTTTGGCCCCAATGGTTGA
2Ra	2R_32594120_a	G	A	2R_32594120_a_F	CTACACGTTCAGAGTTCTACAGTCCGATCGTTTTTACTACGAAACTGGCT	2R_32594120_a_R	GTGACTGGAGTTCAGACGTGTGCTCTTCCGATCTACAAGCAACGTAATCGATGGA
2Ra	2R_32741916_a	C	T	2R_32741916_a_F	CTACACGTTCAGAGTTCTACAGTCCGACCGTATGGTTTGGAAGTTTAGAAA	2R_32741916_a_R	GTGACTGGAGTTCAGACGTGTGCTCTTCCGATCTCTTCAAGGAGGAGCTGTGGG
2Ra	2R_33498207_a	T	C	2R_33498207_a_F	CTACACGTTCAGAGTTCTACAGTCCGATTTCGATGTGGCAGCTGTTG	2R_33498207_a_R	GTGACTGGAGTTCAGACGTGTGCTCTTCCGATCTTGGAAGAAGAATCGGACCACG
2Ra	2R_33771305_a	G	A	2R_33771305_a_F	CTACACGTTCAGAGTTCTACAGTCCGAGATTTGCCACCGCATGTTGT	2R_33771305_a_R	GTGACTGGAGTTCAGACGTGTGCTCTTCCGATCTGGAAAGCAGGAAAGTTGTGACG
2Ra	2R_33837021_a	A	C	2R_33837021_a_F	CTACACGTTCAGAGTTCTACAGTCCGATACGGTTCCACGGGAGC	2R_33837021_a_R	GTGACTGGAGTTCAGACGTGTGCTCTTCCGATCTGACCGCGAACAGACCTACC
2Ra	2R_33899765_a	T	G	2R_33899765_a_F	CTACACGTTCAGAGTTCTACAGTCCGAGACCCATCCTTGGACCCTTT	2R_33899765_a_R	GTGACTGGAGTTCAGACGTGTGCTCTTCCGATCTATCTGCGATTGCTCTCCGTT
3Ra	3R_1995604_a	A	G	3R_1995604_a_F	CTACACGTTCAGAGTTCTACAGTCCGACCTCTCCGTGCTTATCCGTG	3R_1995604_a_R	GTGACTGGAGTTCAGACGTGTGCTCTTCCGATCTTCACCATGAACGACCTTCCG
3Ra	3R_2063832_a	C	T	3R_2063832_a_F	CTACACGTTCAGAGTTCTACAGTCCGATGGCGAATTATCTAAGCTCATCA	3R_2063832_a_R	GTGACTGGAGTTCAGACGTGTGCTCTTCCGATCTCGTTTATTGACAAAAAGAGAAGGGG
3Ra	3R_2070077_a	C	T	3R_2070077_a_F	CTACACGTTCAGAGTTCTACAGTCCGAGGCAAACGATTTCCCTTCCC	3R_2070077_a_R	GTGACTGGAGTTCAGACGTGTGCTCTTCCGATCTTGTAGCCACTCTAGACCGGT
3Ra	3R_2094383_a	T	A	3R_2094383_a_F	CTACACGTTCAGAGTTCTACAGTCCGAAGGAAGCATTGTAACCGGGC	3R_2094383_a_R	GTGACTGGAGTTCAGACGTGTGCTCTTCCGATCTGGGTGTCCAGTCGGAGGT
3Ra	3R_2096087_a	G	A	3R_2096087_a_F	CTACACGTTCAGAGTTCTACAGTCCGACGTGGCGTAGGTTCAGGTAA	3R_2096087_a_R	GTGACTGGAGTTCAGACGTGTGCTCTTCCGATCTGCTTCTCCTTGGCCTGATGT
3Ra	3R_2097313_a	G	A	3R_2097313_a_F	CTACACGTTCAGAGTTCTACAGTCCGATGACATGAGCCTTCGGTTCC	3R_2097313_a_R	GTGACTGGAGTTCAGACGTGTGCTCTTCCGATCTGCTGTACCATTTGGACACGC
3Ra	3R_2098139_a	G	A	3R_2098139_a_F	CTACACGTTCAGAGTTCTACAGTCCGAACCTCCATCCAGTTCTCCAGA	3R_2098139_a_R	GTGACTGGAGTTCAGACGTGTGCTCTTCCGATCTTCGTCCAACTGCACAGAGTG
3Ra	3R_2099165_a	A	T	3R_2099165_a_F	CTACACGTTCAGAGTTCTACAGTCCGAGGCTTCCTGTCGCGATATCA	3R_2099165_a_R	GTGACTGGAGTTCAGACGTGTGCTCTTCCGATCTACAACGTAGACTCAAACCCGA
3Ra	3R_2150345_a	T	A	3R_2150345_a_F	CTACACGTTCAGAGTTCTACAGTCCGAGCATTTGCTTTGTCATCTCTTAGGA	3R_2150345_a_R	GTGACTGGAGTTCAGACGTGTGCTCTTCCGATCTACGAGCAAAACATCTACACCCA
3Ra	3R_2197287_a	A	C	3R_2197287_a_F	CTACACGTTCAGAGTTCTACAGTCCGACGTCCGTAGCGTCCGATC	3R_2197287_a_R	GTGACTGGAGTTCAGACGTGTGCTCTTCCGATCTGCCTGTGCTATCGGAGACAA
3Ra	3R_3682040_a	T	C	3R_3682040_a_F	CTACACGTTCAGAGTTCTACAGTCCGAGGTGGTGGGAAAAGATACACG	3R_3682040_a_R	GTGACTGGAGTTCAGACGTGTGCTCTTCCGATCTGACTGTTCCTTCGGTTCCGT
3Ra	3R_7918315_a	A	C	3R_7918315_a_F	CTACACGTTCAGAGTTCTACAGTCCGACGGTGGTCCCATTTTGCATG	3R_7918315_a_R	GTGACTGGAGTTCAGACGTGTGCTCTTCCGATCTCGTTTGTCGTTTCGCCGTAC
3Ra	3R_9158876_a	C	T	3R_9158876_a_F	CTACACGTTCAGAGTTCTACAGTCCGACAGTTCCTGTTTCCTGAATGCA	3R_9158876_a_R	GTGACTGGAGTTCAGACGTGTGCTCTTCCGATCTAGCAAGGATCACTTCACCCG
3Ra	3R_10426851_a	G	A	3R_10426851_a_F	CTACACGTTCAGAGTTCTACAGTCCGATGCTGGTGGTGCTAGTCATC	3R_10426851_a_R	GTGACTGGAGTTCAGACGTGTGCTCTTCCGATCTAAACTTCCTCTGCCGTCTCG
3Ra	3R_10448014_a	C	G	3R_10448014_a_F	CTACACGTTCAGAGTTCTACAGTCCGAAAACAAAAACAAGGCACGCA	3R_10448014_a_R	GTGACTGGAGTTCAGACGTGTGCTCTTCCGATCTCGAAGGCGTAATGGGCACTA
3Ra	3R_10480608_a	A	G	3R_10480608_a_F	CTACACGTTCAGAGTTCTACAGTCCGACCGGCCTGCATTCCAAACTA	3R_10480608_a_R	GTGACTGGAGTTCAGACGTGTGCTCTTCCGATCTGAAACGGAACAGACGCGAAC
3Ra	3R_10486599_a	A	T	3R_10486599_a_F	CTACACGTTCAGAGTTCTACAGTCCGAGGCGAACGGGAAAATTGTCC	3R_10486599_a_R	GTGACTGGAGTTCAGACGTGTGCTCTTCCGATCTGCAATAACCCCCCAGACACA
3Ra	3R_10488834_a	C	T	3R_10488834_a_F	CTACACGTTCAGAGTTCTACAGTCCGATAGTCTACGACGCACGCTTG	3R_10488834_a_R	GTGACTGGAGTTCAGACGTGTGCTCTTCCGATCTGATGGAGCACGCTTGAATGC
3Ra	3R_10777187_a	C	G	3R_10777187_a_F	CTACACGTTCAGAGTTCTACAGTCCGAGCCGATTCACCCGTCAC	3R_10777187_a_R	GTGACTGGAGTTCAGACGTGTGCTCTTCCGATCTCGGCTGCAGAATCTGAAGGA
3Ra	3R_10789797_a	C	A	3R_10789797_a_F	CTACACGTTCAGAGTTCTACAGTCCGATGTGGTGTATGTTTTGCATAGTTGT	3R_10789797_a_R	GTGACTGGAGTTCAGACGTGTGCTCTTCCGATCTGCAACTACAAAACTAAGCGTAAGGA
3Ra	3R_10794820_a	C	A	3R_10794820_a_F	CTACACGTTCAGAGTTCTACAGTCCGACCATACCGCCCATGGATTGT	3R_10794820_a_R	GTGACTGGAGTTCAGACGTGTGCTCTTCCGATCTTGCTTACATTGGAGGAGCGG
3Ra	3R_10796126_a	G	C	3R_10796126_a_F	CTACACGTTCAGAGTTCTACAGTCCGAACGAAAGCGGAGGAACCAAA	3R_10796126_a_R	GTGACTGGAGTTCAGACGTGTGCTCTTCCGATCTCGAGATGCAGAAAGCCATCG
3Ra	3R_10798338_a	C	G	3R_10798338_a_F	CTACACGTTCAGAGTTCTACAGTCCGAGCATATCGTTTTCTTTCTTTTCTCC	3R_10798338_a_R	GTGACTGGAGTTCAGACGTGTGCTCTTCCGATCTTCTCATGTCCGGCAGTGAAC
3Ra	3R_10858954_a	C	T	3R_10858954_a_F	CTACACGTTCAGAGTTCTACAGTCCGAGCACCTGGTTGTACGGAGTA	3R_10858954_a_R	GTGACTGGAGTTCAGACGTGTGCTCTTCCGATCTTCTGAAGCAAGCATTCTGGC
3Ra	3R_10862050_a	C	T	3R_10862050_a_F	CTACACGTTCAGAGTTCTACAGTCCGATTTCATGCTTCGCACGAGTG	3R_10862050_a_R	GTGACTGGAGTTCAGACGTGTGCTCTTCCGATCTTCACTCTTGCACTGCCCTTT
3Ra	3R_10869128_a	A	G	3R_10869128_a_F	CTACACGTTCAGAGTTCTACAGTCCGATCGGGTAATTTGTTGAACGGA	3R_10869128_a_R	GTGACTGGAGTTCAGACGTGTGCTCTTCCGATCTACGTGCAAACAAACGGCAAT
3Ra	3R_10883891_a	A	G	3R_10883891_a_F	CTACACGTTCAGAGTTCTACAGTCCGAGGAACACTTGTTGCGCTGC	3R_10883891_a_R	GTGACTGGAGTTCAGACGTGTGCTCTTCCGATCTAGCTAAAACGCATTGTGATGGA
3Ra	3R_10885744_a	A	G	3R_10885744_a_F	CTACACGTTCAGAGTTCTACAGTCCGACCCACCAATCAATTGAAACGCA	3R_10885744_a_R	GTGACTGGAGTTCAGACGTGTGCTCTTCCGATCTTGTCTGATCTTCCGCGACAG
3Ra	3R_10895952_a	A	T	3R_10895952_a_F	CTACACGTTCAGAGTTCTACAGTCCGATCAATCTAGATTCCCTTGCGG	3R_10895952_a_R	GTGACTGGAGTTCAGACGTGTGCTCTTCCGATCTAGGTTCCGCAAAGAAAGGGA
3Ra	3R_10976503_a	G	A	3R_10976503_a_F	CTACACGTTCAGAGTTCTACAGTCCGACGTTATCATACGCAACCCCG	3R_10976503_a_R	GTGACTGGAGTTCAGACGTGTGCTCTTCCGATCTTCCATTACTTAAGGAAAGCAGTACT
3Ra	3R_10997578_a	C	G	3R_10997578_a_F	CTACACGTTCAGAGTTCTACAGTCCGAATCGCTCCTTCGCTAAGCTG	3R_10997578_a_R	GTGACTGGAGTTCAGACGTGTGCTCTTCCGATCTATTGTCGTGCCCTTCAGCTT
3Rb	3R_21593974_b	T	C	3R_21593974_b_F	CTACACGTTCAGAGTTCTACAGTCCGATCTGTGGTGGCTCGTCAATC	3R_21593974_b_R	GTGACTGGAGTTCAGACGTGTGCTCTTCCGATCTCCAAAACGTAAACGGTGGGG
3Rb	3R_22087709_b	T	C	3R_22087709_b_F	CTACACGTTCAGAGTTCTACAGTCCGAATAGTTTACCGGCACTAGCGG	3R_22087709_b_R	GTGACTGGAGTTCAGACGTGTGCTCTTCCGATCTGTGAGCGGTTCCGAGATCAT
3Rb	3R_22141405_b	T	C	3R_22141405_b_F	CTACACGTTCAGAGTTCTACAGTCCGAGCACCGTGTCGTCCTATACA	3R_22141405_b_R	GTGACTGGAGTTCAGACGTGTGCTCTTCCGATCTAGGGCACAACTGTACCATCTG
3Rb	3R_22443138_b	A	G	3R_22443138_b_F	CTACACGTTCAGAGTTCTACAGTCCGACACCATCACCAAAAACCACCA	3R_22443138_b_R	GTGACTGGAGTTCAGACGTGTGCTCTTCCGATCTAAATACCAATCAGCCCGCCA
3Rb	3R_22539883_b	T	C	3R_22539883_b_F	CTACACGTTCAGAGTTCTACAGTCCGAAGTAAGCAAACAAACCGATTCCA	3R_22539883_b_R	GTGACTGGAGTTCAGACGTGTGCTCTTCCGATCTACGACAACCAGATTTCATAAAACCC
3Rb	3R_22610377_b	A	G	3R_22610377_b_F	CTACACGTTCAGAGTTCTACAGTCCGAGGCGGCAGGCGTACTATTTA	3R_22610377_b_R	GTGACTGGAGTTCAGACGTGTGCTCTTCCGATCTTTTGCCCAACCAGTAAACGG
3Rb	3R_22631746_b	A	G	3R_22631746_b_F	CTACACGTTCAGAGTTCTACAGTCCGACACCCAGGGGCTCACTTAAG	3R_22631746_b_R	GTGACTGGAGTTCAGACGTGTGCTCTTCCGATCTGCATTTCTGCTGTTGCTACCA
3Rb	3R_22746843_b	G	A	3R_22746843_b_F	CTACACGTTCAGAGTTCTACAGTCCGATGCGTGGACCTTCAAACGAA	3R_22746843_b_R	GTGACTGGAGTTCAGACGTGTGCTCTTCCGATCTGGATGCGACCATCTTCCACT
3Rb	3R_22814728_b	G	A	3R_22814728_b_F	CTACACGTTCAGAGTTCTACAGTCCGAATTCCACAGGCAGCATCGTT	3R_22814728_b_R	GTGACTGGAGTTCAGACGTGTGCTCTTCCGATCTTCCTCGTTTTTTTCCCTTTCGC
3Rb	3R_23021477_b	T	C	3R_23021477_b_F	CTACACGTTCAGAGTTCTACAGTCCGACCGTCACTAGCCACATTGGT	3R_23021477_b_R	GTGACTGGAGTTCAGACGTGTGCTCTTCCGATCTAACACTAGGTCGCACGGTAC
3Rb	3R_23040516_b	T	C	3R_23040516_b_F	CTACACGTTCAGAGTTCTACAGTCCGAACCATTGCGTTGTCTACCCA	3R_23040516_b_R	GTGACTGGAGTTCAGACGTGTGCTCTTCCGATCTTTTCACGTTCCATTCCACGG
3Rb	3R_23058861_b	A	G	3R_23058861_b_F	CTACACGTTCAGAGTTCTACAGTCCGAACACCTCAATCCCGTACGTT	3R_23058861_b_R	GTGACTGGAGTTCAGACGTGTGCTCTTCCGATCTGCGATGGATAGGAAATGAGCG
3Rb	3R_23111946_b	A	T	3R_23111946_b_F	CTACACGTTCAGAGTTCTACAGTCCGAGGCGGTCTTCATTGATTGGG	3R_23111946_b_R	GTGACTGGAGTTCAGACGTGTGCTCTTCCGATCTCAAACATGGGAAAGAAGGGGT
3Rb	3R_23280705_b	A	G	3R_23280705_b_F	CTACACGTTCAGAGTTCTACAGTCCGAACGTACAGCAATATTTTTCGCT	3R_23280705_b_R	GTGACTGGAGTTCAGACGTGTGCTCTTCCGATCTAGGGGAGGTTGAAGACTGAA
3Rb	3R_25688749_b	A	T	3R_25688749_b_F	CTACACGTTCAGAGTTCTACAGTCCGAGGCATTGGCGTCACGTTT	3R_25688749_b_R	GTGACTGGAGTTCAGACGTGTGCTCTTCCGATCTCCAAACGATTTCCATTTCCTGA
3Rb	3R_26030996_b	G	C	3R_26030996_b_F	CTACACGTTCAGAGTTCTACAGTCCGAAAACGCGATTTGTGGCTACG	3R_26030996_b_R	GTGACTGGAGTTCAGACGTGTGCTCTTCCGATCTCGAAAGCGGCCTTTATTGTT
3Rb	3R_30037802_b	C	G	3R_30037802_b_F	CTACACGTTCAGAGTTCTACAGTCCGATCACATTTCCACCCTAGAACG	3R_30037802_b_R	GTGACTGGAGTTCAGACGTGTGCTCTTCCGATCTTTGTGCGGTTTCGTTTTCGG
3Rb	3R_30123420_b	A	G	3R_30123420_b_F	CTACACGTTCAGAGTTCTACAGTCCGAACAATTTACAGAGCTTCGTACGC	3R_30123420_b_R	GTGACTGGAGTTCAGACGTGTGCTCTTCCGATCTAACCGTACGTATGCCCTTGG
3Rb	3R_30516692_b	T	A	3R_30516692_b_F	CTACACGTTCAGAGTTCTACAGTCCGATGCACACAACACAACTGAACA	3R_30516692_b_R	GTGACTGGAGTTCAGACGTGTGCTCTTCCGATCTGTACGAAAGGAAAGCGGCAG
3Rb	3R_30661948_b	T	C	3R_30661948_b_F	CTACACGTTCAGAGTTCTACAGTCCGATCGAACTGCAAACCGTGAAC	3R_30661948_b_R	GTGACTGGAGTTCAGACGTGTGCTCTTCCGATCTTCTATGCGTCCACAGAACGT
3Rb	3R_30739440_b	T	G	3R_30739440_b_F	CTACACGTTCAGAGTTCTACAGTCCGAGCGTTGTATTAACGGCCACC	3R_30739440_b_R	GTGACTGGAGTTCAGACGTGTGCTCTTCCGATCTACGCAGCACCATCCCTTC
3Rb	3R_30902012_b	G	T	3R_30902012_b_F	CTACACGTTCAGAGTTCTACAGTCCGAACGATTAGTAGTCGGCGCAA	3R_30902012_b_R	GTGACTGGAGTTCAGACGTGTGCTCTTCCGATCTGCTGCTACTACTGCTGCTGT
3Rb	3R_31397626_b	C	T	3R_31397626_b_F	CTACACGTTCAGAGTTCTACAGTCCGATGAGAGCGTTGCCTGGTAAG	3R_31397626_b_R	GTGACTGGAGTTCAGACGTGTGCTCTTCCGATCTGTTTGGAGAATGTTCGACGCC
3Rb	3R_31568791_b	A	T	3R_31568791_b_F	CTACACGTTCAGAGTTCTACAGTCCGATGAACATTCGTTTCGCTCGA	3R_31568791_b_R	GTGACTGGAGTTCAGACGTGTGCTCTTCCGATCTGCATAAAGGCACTGCATCCC
3Rb	3R_32435459_b	A	C	3R_32435459_b_F	CTACACGTTCAGAGTTCTACAGTCCGAACGAACCCAGTCAGCACATT	3R_32435459_b_R	GTGACTGGAGTTCAGACGTGTGCTCTTCCGATCTACAACAAACCCGAAGCGTCA
3Rb	3R_32492194_b	A	G	3R_32492194_b_F	CTACACGTTCAGAGTTCTACAGTCCGATGTAAAACGTACCATTTGAAGGG	3R_32492194_b_R	GTGACTGGAGTTCAGACGTGTGCTCTTCCGATCTCGGAGTCATAGTTGGGAAGGA
