# Supplementary figures and images for: High-Throughput Genotyping of Common Chromosomal Inversions in the Afrotropical Malaria Mosquito Anopheles Funestus
Source: MDPI journal article supplement (doi:10.3390/insects11100693), 2020-10-13

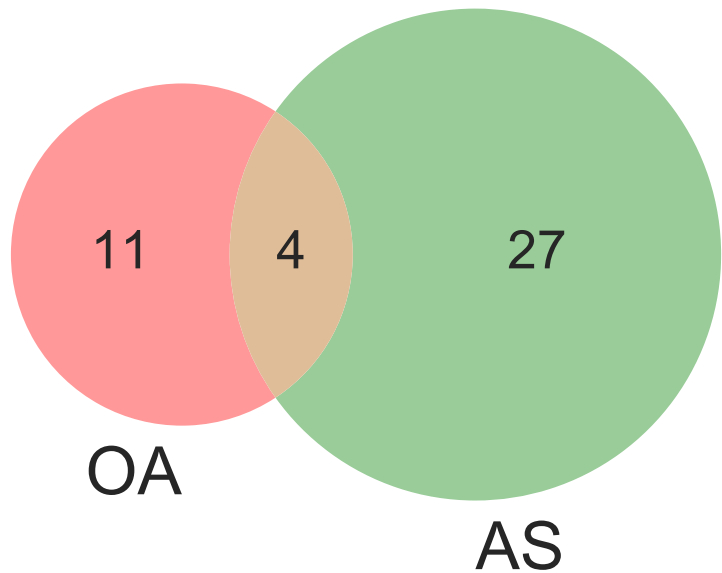

(a)

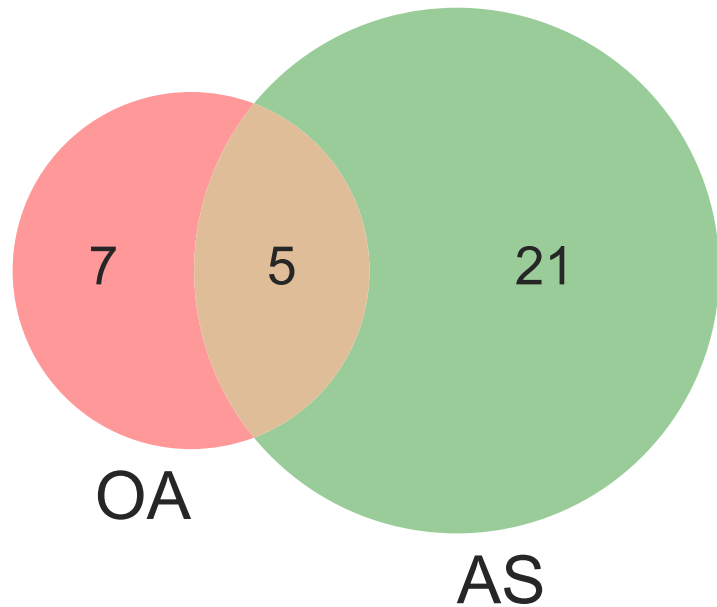

(b)

Supplement: s1 [file s1]

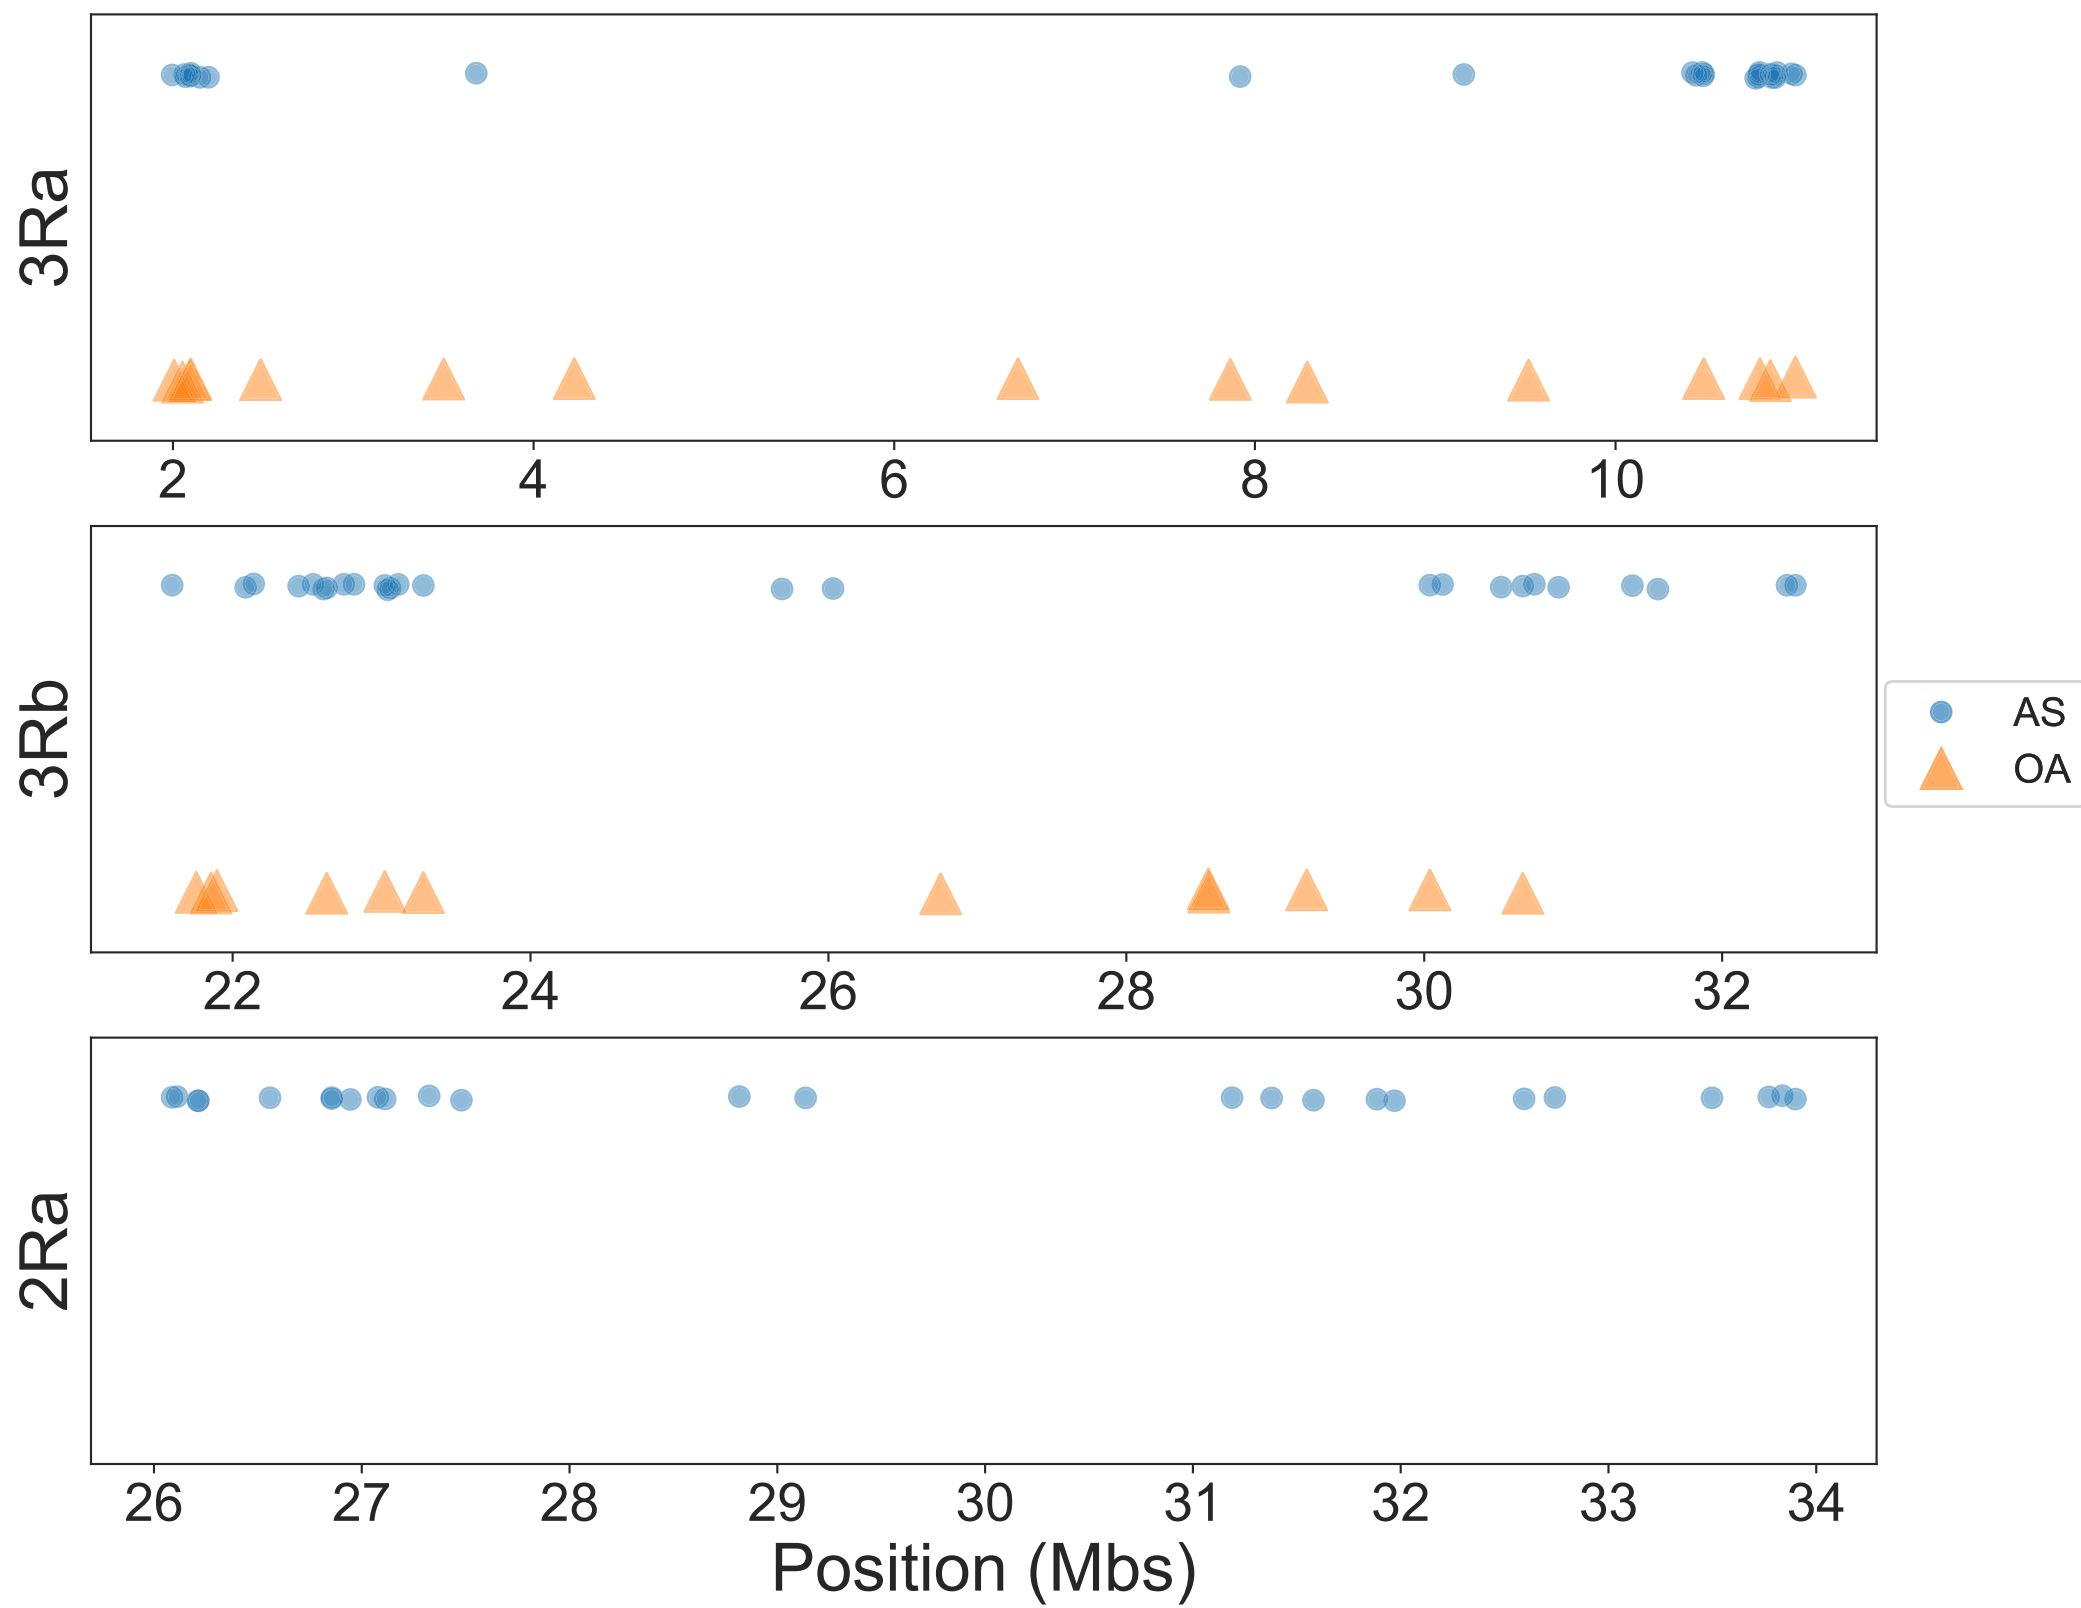

Supplement: s1 [file s1]
